# Supplementary material
Source: PubMed Central journal article supplement (PMC3232652)
Supplement: supp_79.12.4876_IAI5451-11_ST1.pdf [file supp_79.12.4876_IAI5451-11_ST1.pdf]

**Table S1. Selected gene transcripts altered in macrophages at 4 h after exposure to live *Borrelia burgdorferi* (Bb) as compared to those exposed to live Bb in the presence of added IL-10**

| Gene number | Annotation    | Fold change |                 | Ratio                       | Description/function                                                               |
|-------------|---------------|-------------|-----------------|-----------------------------|------------------------------------------------------------------------------------|
|             |               | Live Bb     | Live Bb + IL-10 | Live Bb/<br>Live Bb + IL-10 |                                                                                    |
|             |               |             |                 |                             | <b>Cytokine</b>                                                                    |
| NM_011337   | <u>Ccl3</u>   | 17.01       | 16.04           | 1.06                        | Chemokine (C-C motif) ligand 3                                                     |
| NM_013654   | <u>Ccl7</u>   | 3.16        | 3.61            | 0.88                        | Chemokine (C-C motif) ligand 7                                                     |
|             |               |             |                 |                             | <b>Enzyme</b>                                                                      |
| NM_028810   | Rnd3          | 3.66        | 3.41            | 1.07                        | Rho family GTPase 3                                                                |
| NM_133223   | Rac3          | 2.75        | 2.77            | 0.99                        | RAS-related C3 botulinum substrate 3                                               |
| NM_145491   | <u>Rhoq</u>   | 2.19        | 2.22            | 0.99                        | Ras homolog gene family, member Q                                                  |
| NM_018868   | Nol5          | 2.39        | 2.43            | 0.98                        | Nucleolar protein 5                                                                |
| NM_007464   | <u>Birc3</u>  | 4.02        | 4.1             | 0.98                        | Baculoviral IAP repeat-containing 3                                                |
| NM_145953   | Cth           | 3.63        | 3.81            | 0.95                        | Cystathionase (cystathionine gamma-lyase)                                          |
| NM_053108   | <u>GlrX</u>   | 3.41        | 3.61            | 0.94                        | Glutaredoxin                                                                       |
| NM_018734   | <u>Gbp4</u>   | 6.25        | 7.08            | 0.88                        | Guanylate nucleotide binding protein 3                                             |
| NM_011408   | Slfn2         | 4.09        | 4.83            | 0.85                        | Schlafen 2                                                                         |
|             |               |             |                 |                             | <b>G-protein coupled receptor</b>                                                  |
| NM_017466   | Ccr12         | 14.11       | 12.57           | 1.12                        | Chemokine (C-C motif) receptor-like 2                                              |
| NM_145066   | Gpr85         | 4.18        | 3.78            | 1.11                        | G protein-coupled receptor 85                                                      |
| NM_008965   | Ptger4        | 4.67        | 4.25            | 1.1                         | Prostaglandin E receptor 4 (subtype EP4)                                           |
| NM_030720   | <u>Gpr84</u>  | 6.11        | 7.16            | 0.85                        | G protein-coupled receptor 84                                                      |
|             |               |             |                 |                             | <b>Ion channel</b>                                                                 |
| NM_013885   | Clic4         | 2.22        | 2.5             | 0.89                        | Chloride intracellular channel 4 (mitochondrial)                                   |
|             |               |             |                 |                             | <b>kinase</b>                                                                      |
| NM_008413   | Jak2          | 3.52        | 3.97            | 0.89                        | Janus kinase 2                                                                     |
| NM_013820   | <u>Hk2</u>    | 3.61        | 4.18            | 0.86                        | Hexokinase 2                                                                       |
| NM_172734   | Stk381        | 2.58        | 3.09            | 0.84                        | Serine/threonine kinase 38 like                                                    |
|             |               |             |                 |                             | <b>Peptidase</b>                                                                   |
| NM_007609   | <u>Casp4</u>  | 4.05        | 4.25            | 0.95                        | Caspase 4, apoptosis-related cysteine peptidase                                    |
|             |               |             |                 |                             | <b>Phosphatase</b>                                                                 |
| NM_010090   | <u>Dusp2</u>  | 11.11       | 11.02           | 1.01                        | Dual specificity phosphatase 2                                                     |
| NM_026849   | 1110061O04Rik | 2.24        | 2.67            | 0.84                        | Myotubularin related protein 14                                                    |
|             |               |             |                 |                             | <b>Transcription regulator</b>                                                     |
| NM_030612   | <u>Nfkbiz</u> | 16.76       | 14.13           | 1.19                        | Nuclear factor of kappa light polypeptide gene enhancer in B-cells inhibitor, zeta |
| BC006925    | <u>E1l2</u>   | 8.12        | 7.08            | 1.15                        | Elongation factor RNA polymerase II 2                                              |
| NM_019408   | Nfkb2         | 3.25        | 2.94            | 1.11                        | Nuclear factor of kappa light polypeptide gene enhancer in B-cells 2, p49/p100     |
| NM_148924   | Zfp263        | 2.78        | 2.63            | 1.06                        | Zinc finger 263                                                                    |
| NM_010723   | Lmo4          | 2.67        | 2.57            | 1.04                        | LIM domain only 4                                                                  |
| NM_009046   | Relb          | 3.24        | 3.14            | 1.03                        | Avian reticuloendotheliosis viral (v-rel) oncogene related B                       |
| NM_011756   | <u>Zfp36</u>  | 4.48        | 4.48            | 1                           | Zinc finger protein 36                                                             |
| BC082312    | Arid5b        | 2.94        | 3.16            | 0.93                        | AT rich interactive domain 5B (Mrf1 like)                                          |

|                               |               |       |       |      |                                                                                      |
|-------------------------------|---------------|-------|-------|------|--------------------------------------------------------------------------------------|
| NM_010908                     | Nfkbib        | 3.28  | 3.71  | 0.89 | Nuclear factor of kappa light chain gene enhancer in B-cells inhibitor, beta         |
| NM_009883                     | Cebpb         | 3.68  | 4.25  | 0.87 | CCAAT/enhancer binding protein (C/EBP), beta                                         |
| <b>Transmembrane receptor</b> |               |       |       |      |                                                                                      |
| NM_011610                     | Tnfrsf1b      | 2.88  | 2.66  | 1.08 | Tumor necrosis factor receptor superfamily, member 1b                                |
| NM_030691                     | Igsf6         | 5.67  | 5.25  | 1.08 | Immunoglobulin superfamily, member 6                                                 |
| NM_007987                     | Fas           | 8.54  | 8.07  | 1.06 | Fas (TNF receptor superfamily member 6)                                              |
| <b>Transporter</b>            |               |       |       |      |                                                                                      |
| NM_008466                     | Kpna3         | 2.65  | 2.28  | 1.16 | Karyopherin (importin) alpha 3                                                       |
| NM_025286                     | Slc31a2       | 4.34  | 3.85  | 1.13 | Solute carrier family 31, member 2                                                   |
| NM_026482                     | Atp2b1        | 2.39  | 2.2   | 1.09 | ATPase, Ca <sup>++</sup> transporting, plasma membrane 1                             |
| NM_028035                     | Snx10         | 3.31  | 3.08  | 1.08 | Sorting nexin 10                                                                     |
| NM_011400                     | Slc2a1        | 3.57  | 3.88  | 0.92 | Solute carrier family 2 (facilitated glucose transporter), member 1                  |
| NM_172659                     | Slc2a6        | 2.86  | 3.3   | 0.87 | Solute carrier family 2 (facilitated glucose transporter), member 6                  |
| <b>Others</b>                 |               |       |       |      |                                                                                      |
| NM_026405                     | Rab32         | 2.51  | 2.14  | 1.17 | RAB32, member RAS oncogene family                                                    |
| NM_019948                     | Clec4e        | 6.16  | 5.26  | 1.17 | C-type lectin domain family 4, member e                                              |
| XM_134088/<br>AK030769        | Rab11fip1     | 5.45  | 4.74  | 1.15 | Unknown                                                                              |
| NM_009302                     | Swap70        | 4.27  | 3.81  | 1.12 | SWA-70 protein                                                                       |
| NM_029000                     | Gvin1         | 2.61  | 2.36  | 1.11 | GTPase, very large interferon inducible 1                                            |
| NM_021327                     | Tnip1         | 4.56  | 4.18  | 1.09 | TNFAIP3 interacting protein 1                                                        |
| NM_009058                     | Ralgds        | 5.39  | 4.96  | 1.09 | Ral guanine nucleotide dissociation stimulator                                       |
| NM_007754/<br>AK134736        | Cpd           | 3.65  | 3.37  | 1.08 | Carboxypeptidase D                                                                   |
| NM_007707                     | Socs3         | 11.38 | 10.56 | 1.08 | Suppressor of cytokine signaling 3                                                   |
| AK085741                      | Cln5          | 3.22  | 2.99  | 1.08 | Ceroid-lipofuscinosis, neuronal 5                                                    |
| NM_178045                     | Rassf4        | 4.34  | 4.09  | 1.06 | Ras association (RalGDS/AF-6) domain family 4                                        |
| NM_207680                     | Bcl2l11       | 3.9   | 3.71  | 1.05 | BCL2-like 11 (apoptosis facilitator)                                                 |
| NM_153118                     | Fnbp11        | 4.62  | 4.41  | 1.05 | Formin binding protein 1-like                                                        |
| XM_898828                     | 2610030H06Rik | 2.46  | 2.38  | 1.03 | Unknown                                                                              |
| ENSMUST0000                   | ENSMUST0000   |       |       |      |                                                                                      |
| 0022882                       | 0022882       | 3.53  | 3.41  | 1.03 | Unknown                                                                              |
| AK152177/<br>L38281           | Irg1          | 23.05 | 22.06 | 1.04 | Immunoresponsive gene 1                                                              |
| NM_021511                     | Rrs1          | 3.34  | 3.23  | 1.03 | RRS1 ribosome biogenesis regulator homolog ( <i>S. cerevisiae</i> )                  |
| NM_009186                     | Sfrs10        | 2.32  | 2.27  | 1.02 | Splicing factor, arginine/serine-rich 10 (transformer 2 homolog, <i>Drosophila</i> ) |
| NM_030565                     | BC004044      | 4.1   | 4.08  | 1.01 | CDNA sequence BC004044                                                               |
| NM_009396                     | Tnfaip2       | 4.07  | 4.1   | 0.99 | Tumor necrosis factor, alpha-induced protein 2                                       |
| NM_133206                     | Znrf1         | 2.21  | 2.22  | 0.99 | Zinc and ring finger 1                                                               |
| NM_009510                     | Vil2          | 4.39  | 4.74  | 0.93 | Villin 2                                                                             |
| NM_010807                     | Marcks11      | 4.31  | 4.71  | 0.92 | MARCKS-like 1                                                                        |
| NM_010259                     | Gbp1          | 2.85  | 3.19  | 0.89 | Guanylate nucleotide binding protein 1                                               |
| NM_010907                     | Nfkbia        | 9.11  | 10.27 | 0.89 | Nuclear factor of kappa light chain gene enhancer in B-cells inhibitor, alpha        |
| NM_011191                     | Psme2b-ps     | 2.39  | 2.71  | 0.88 | Unknown                                                                              |

|           |                |      |      |      |                                                               |
|-----------|----------------|------|------|------|---------------------------------------------------------------|
| NM_013532 | <u>Lilrb4</u>  | 2.46 | 2.78 | 0.88 | Leukocyte immunoglobulin-like receptor, subfamily B, member 4 |
| NM_011414 | <u>Slpi</u>    | 2.59 | 2.93 | 0.88 | Secretory leukocyte peptidase inhibitor                       |
| NM_178616 | Psm11          | 2.37 | 2.69 | 0.88 | Proteasome (prosome, macropain) 26S subunit, non-ATPase, 11   |
| TC1415519 | TC1415519      | 2.42 | 2.77 | 0.87 | Unknown                                                       |
| BC076612  | 3110043O21Rik  | 2.56 | 2.96 | 0.86 | RIKEN cDNA 3110043O21 gene                                    |
| XM_146893 | <u>Zc3h12c</u> | 7.45 | 8.73 | 0.85 | Zinc finger CCCH type containing 12C                          |

A corrected one-way analysis of variance was used to analyze the microarray data. Genes whose expression levels changed by at least 2-fold or more up-regulated genes ( $P < 0.05$ ) as compared to unstimulated cells were considered to be differentially expressed in a statistically significant manner. The underlined genes are common to both the 4 and 24 h time-points.
