# Supplementary material
Source: PubMed Central journal article supplement (PMC3232652)
Supplement: supp_79.12.4876_IAI5451-11_ST2.pdf [file supp_79.12.4876_IAI5451-11_ST2.pdf]

**Table S2. Selected gene transcripts altered in macrophages at 24 h after exposure to live *Borrelia burgdorferi* (Bb) as compared to those exposed to live Bb in the presence of added IL-10**

| Gene number     | Annotation      | Fold change |                 | Ratio                       | Description/function                                                               |
|-----------------|-----------------|-------------|-----------------|-----------------------------|------------------------------------------------------------------------------------|
|                 |                 | Live Bb     | Live Bb + IL-10 | Live Bb/<br>Live Bb + IL-10 |                                                                                    |
|                 |                 |             |                 |                             | <b>Cytokine</b>                                                                    |
| NM_011337       | <u>Ccl3</u>     | 10.63       | 9.25            | 1.15                        | Chemokine (C-C motif) ligand 3                                                     |
| NM_031167       | <u>Il1rn</u>    | 4.43        | 4.63            | 0.96                        | Interleukin 1 receptor antagonist                                                  |
| NM_010548       | <u>Il10</u>     | 4.07        | 4.71            | 0.86                        | Interleukin 10                                                                     |
|                 |                 |             |                 |                             | <b>Enzyme</b>                                                                      |
| NM_025278       | Gng12           | 2.68        | 2.33            | 1.15                        | Guanine nucleotide binding protein (G protein), gamma 12                           |
| NM_018851       | Samhd1          | 2.88        | 2.55            | 1.13                        | SAM domain and HD domain, 1                                                        |
| NM_012054       | Aoah            | 2.82        | 2.65            | 1.06                        | Acyloxyacyl hydrolase                                                              |
| NM_023141       | Tor3a           | 2.38        | 2.57            | 0.93                        | Torsin family 3, member A                                                          |
| NM_027959       | Pdia6           | 2.35        | 2.56            | 0.92                        | Protein disulfide isomerase associated 6                                           |
| NM_012021       | Prdx5           | 2.53        | 2.86            | 0.88                        | Peroxiredoxin 5                                                                    |
|                 |                 |             |                 |                             | <b>G-protein coupled receptor</b>                                                  |
| NM_008773       | P2ry2           | 2.29        | 2.46            | 0.93                        | Purinergic receptor P2Y, G-protein coupled 2                                       |
|                 |                 |             |                 |                             | <b>Ion channel</b>                                                                 |
| NM_177715       | Kctd12          | 3.63        | 3.09            | 1.18                        | Potassium channel tetramerisation domain containing 12                             |
| NM_134133       | 2010002N04Rik   | 2.28        | 2.62            | 0.87                        | RIKEN cDNA 2010002N04 gene                                                         |
|                 |                 |             |                 |                             | <b>Kinase</b>                                                                      |
| NM_013820       | <u>Hk2</u>      | 3.01        | 2.75            | 1.1                         | Hexokinase 2                                                                       |
| NM_177320       | <u>Pik3r5</u>   | 2.58        | 2.9             | 0.89                        | Phosphoinositide-3-kinase, regulatory subunit 5, p101                              |
| NM_010407       | <u>Hck</u>      | 4.45        | 5.16            | 0.86                        | Hemopoietic cell kinase                                                            |
| NM_019777       | <u>Ikbke</u>    | 2.72        | 3.2             | 0.85                        | Inhibitor of kappaB kinase epsilon                                                 |
|                 |                 |             |                 |                             | <b>Peptidase</b>                                                                   |
| NM_007609       | <u>Casp4</u>    | 4.02        | 3.63            | 1.11                        | Caspase 4, apoptosis-related cysteine peptidase                                    |
| <u>AK134736</u> | <u>Cpd</u>      | 2.92        | 2.98            | 0.98                        | Carboxypeptidase D                                                                 |
|                 |                 |             |                 |                             | <b>Phosphatase</b>                                                                 |
| NM_176919       | Ppm1h           | 2.8         | 2.43            | 1.15                        | Protein phosphatase 1H (PP2C domain containing)                                    |
|                 |                 |             |                 |                             | <b>Transcription regulator</b>                                                     |
| NM_030612       | <u>Nfkbiz</u>   | 10.21       | 9.48            | 1.08                        | Nuclear factor of kappa light polypeptide gene enhancer in B-cells inhibitor, zeta |
| NM_009883       | <u>Cebpb</u>    | 2.37        | 2.62            | 0.9                         | CCAAT/enhancer binding protein (C/EBP), beta                                       |
| NM_008416       | <u>Junb</u>     | 2.51        | 2.83            | 0.89                        | Jun-B oncogene                                                                     |
| NM_007679       | Cebpd           | 2.53        | 2.97            | 0.85                        | CCAAT/enhancer binding protein (C/EBP), delta                                      |
|                 |                 |             |                 |                             | <b>Transmembrane receptor</b>                                                      |
| NM_011610       | <u>Tnfrsf1b</u> | 5.46        | 4.88            | 1.12                        | Tumor necrosis factor receptor superfamily, member 1b                              |
| BC008626        | <u>Icam1</u>    | 2.4         | 2.19            | 1.1                         | Intercellular adhesion molecule                                                    |
| NM_030691       | <u>Igsf6</u>    | 3.23        | 3.28            | 0.98                        | Immunoglobulin superfamily, member 6                                               |
| NM_031195       | <u>Msr1</u>     | 2.7         | 2.83            | 0.95                        | Macrophage scavenger receptor 1                                                    |
|                 |                 |             |                 |                             | <b>Transporter</b>                                                                 |

|                    |                      |      |      |      |                                                            |
|--------------------|----------------------|------|------|------|------------------------------------------------------------|
| NM_011638          | Tfrc                 | 4.72 | 4.15 | 1.14 | Transferrin receptor                                       |
| BC031452           | Rrbp1                | 2.61 | 2.53 | 1.03 | Ribosome binding protein 1                                 |
| <b>Other</b>       |                      |      |      |      |                                                            |
| NM_021327          | <u>Tnfr1</u>         | 3.03 | 2.55 | 1.19 | TNFAIP3 interacting protein 1                              |
| NM_001025156       | Ccdc93               | 2.71 | 2.3  | 1.18 | Coiled-coil domain containing 93                           |
| NM_010708          | Lgals9               | 3.32 | 2.93 | 1.13 | Lectin, galactose binding, soluble 9                       |
| NM_010104          | Edn1                 | 3    | 2.74 | 1.09 | Endothelin 1                                               |
| NM_021893          | Cd274                | 4.65 | 4.26 | 1.09 | CD274 antigen                                              |
| ENSMUST00000042692 | ENSMUST0000042692    | 2.67 | 2.46 | 1.08 | Unknown                                                    |
| NM_009058          | <u>Ralgds</u>        | 3.08 | 2.85 | 1.08 | Ral guanine nucleotide dissociation stimulator             |
| NM_029803          | Ifi27                | 2.59 | 2.41 | 1.08 | Interferon, alpha-inducible protein 27                     |
| BY715385           | 4930519F09Rik        | 2.21 | 2.13 | 1.04 | RIKEN cDNA 4930519F09 gene                                 |
| NM_001024932       | LOC545812            | 2.13 | 2.1  | 1.02 | Paired immunoglobulin-like type 2 receptor beta 2          |
| NM_133209          | Pilrb                | 2.78 | 2.76 | 1.01 | Paired immunoglobulin-like type 2 receptor beta 1          |
| NM_007707          | <u>Socs3</u>         | 6.15 | 6.15 | 1    | Suppressor of cytokine signaling 3                         |
| NM_172722          | C330023M02Rik        | 2.64 | 2.63 | 1    | RIKEN cDNA C330023M02 gene                                 |
| NM_025465          | <u>1810029B16Rik</u> | 3.8  | 3.89 | 0.98 | RIKEN cDNA 1810029B16 gene                                 |
| AT_ssM_TR_5        | AT_ssM_TR_5          | 2.91 | 3.08 | 0.95 | Unknown                                                    |
| NM_027836          | Ms4a7                | 6    | 6.31 | 0.95 | Membrane-spanning 4-domains, subfamily A, member 7         |
| NM_153510          | Pilra                | 3.8  | 4.05 | 0.94 | Paired immunoglobulin-like type 2 receptor alpha           |
| AK083254           | Diap2                | 2.81 | 3.13 | 0.9  | Diaphanous homolog 2 (Drosophila)                          |
| NM_001039692       | Arhgap12             | 3.84 | 4.29 | 0.89 | Rho GTPase activating protein 12                           |
| NM_001029841       | Sla                  | 2.81 | 3.19 | 0.88 | Src-like adaptor                                           |
| NM_020001          | Clec4n               | 4.3  | 5.08 | 0.85 | C-type lectin domain family 4, member n                    |
| NM_023380          | <u>Samsn1</u>        | 2.53 | 3.03 | 0.84 | SAM domain, SH3 domain and nuclear localization signals, 1 |

A corrected one-way analysis of variance was used to analyze the microarray data. Genes whose expression levels changed by at least 2-fold or more up-regulated genes ( $P < 0.05$ ) as compared to unstimulated cells were considered to be differentially expressed in a statistically significant manner. The underlined genes are common to both the 4 and 24 h time-points.
