# Supplementary material
Source: PubMed Central journal article supplement (PMC3232652)
Supplement: supp_79.12.4876_IAI5451-11_ST3.pdf [file supp_79.12.4876_IAI5451-11_ST3.pdf]

**Table S3. Gene transcripts exclusively upregulated in macrophages stimulated with live *Borrelia burgdorferi* (Bb) at 4 h post-stimulation**

| Gene number                              | Annotation    | Fold change Live Bb | Description/function                                                     |
|------------------------------------------|---------------|---------------------|--------------------------------------------------------------------------|
| <b>Cytokine</b>                          |               |                     |                                                                          |
| NM_015766                                | Ebi3          | 2.24                | Epstein-Barr virus induced gene 3                                        |
| <b>Enzyme</b>                            |               |                     |                                                                          |
| NM_145572                                | Gys2          | 10.75               | Glycogen synthase 2                                                      |
| NM_008102                                | <u>Gch1</u>   | 4.38                | GTP cyclohydrolase 1                                                     |
| AK029069                                 | Rnfl139       | 3.98                | Ring finger protein 139                                                  |
| AK039992                                 | Rnd1          | 3.68                | Rho family GTPase 1                                                      |
| NM_009457                                | Ube1x         | 3.68                | Ubiquitin-activating enzyme E1, Chr X                                    |
| AK159899                                 | Hmgcr         | 3.14                | 3-hydroxy-3-methylglutaryl-Coenzyme A reductase                          |
| NM_015762                                | Txnrd1        | 3.1                 | Thioredoxin reductase 1                                                  |
| NM_013614                                | Odc1          | 2.36                | Ornithine decarboxylase, structural 1                                    |
| NM_001024468                             | Bcat1         | 2.35                | Branched chain aminotransferase 1, cytosolic                             |
| NM_008715                                | Ints6         | 2.33                | Integrator complex subunit 6                                             |
| NM_145828                                | Xylt2         | 2.25                | Xylosyltransferase II                                                    |
| NM_011637                                | <u>Trex1</u>  | 2.15                | Three prime repair exonuclease 1                                         |
| NM_023141                                | Tor3a         | 2.15                | Torsin family 3, member A                                                |
| <b>G-protein coupled receptor</b>        |               |                     |                                                                          |
| NM_178701                                | Lrrc8d        | 3.17                | Leucine rich repeat containing 8D                                        |
| NM_175442                                | A630033H20Rik | 2.87                | RIKEN cDNA A630033H20 gene                                               |
| NM_146736                                | Olfir491      | 2.79                | Olfactory receptor 491                                                   |
| NM_010098                                | Opn3          | 2.77                | Opsin (encephalopsin)                                                    |
| NM_207141                                | Olfir955      | 2.58                | Olfactory receptor 955                                                   |
| NM_147035                                | Olfir711      | 2.42                | Olfactory receptor 711                                                   |
| NM_146280                                | Olfir281      | 2.36                | Olfactory receptor 281                                                   |
| NM_010130                                | Emr1          | 2.34                | EGF-like module containing, mucin-like, hormone receptor-like sequence 1 |
| <b>Growth factor</b>                     |               |                     |                                                                          |
| NM_009505                                | Vegfa         | 5.78                | Vascular endothelial growth factor A                                     |
| NM_011819                                | <u>Gdf15</u>  | 2.93                | Growth differentiation factor 15                                         |
| <b>Ion channel</b>                       |               |                     |                                                                          |
| NM_012035                                | Trpc7         | 9.46                | Transient receptor potential cation channel, subfamily C, member 7       |
| NM_027807                                | Cul5          | 4.86                | Cullin 5                                                                 |
| NM_010595                                | Kcna1         | 4.09                | Potassium voltage-gated channel, shaker-related subfamily, member 1      |
| NM_133199                                | Scn4a         | 2.92                | Sodium channel, voltage-gated, type IV, alpha                            |
| <b>Kinase</b>                            |               |                     |                                                                          |
| NM_019827                                | Gsk3b         | 3.43                | Glycogen synthase kinase 3 beta                                          |
| AK079498                                 | AK079498      | 2.51                | NIMA (never in mitosis gene a)-related expressed kinase 7                |
| NM_133232                                | Pfkfb3        | 2.5                 | 6-phosphofructo-2-kinase/fructose-2,6-biphosphatase 3                    |
| NM_024182                                | <u>Riok3</u>  | 2.33                | RIO kinase 3 (yeast)                                                     |
| NM_010879                                | Nck2          | 2.32                | Non-catalytic region of tyrosine kinase adaptor protein 2                |
| NM_028679                                | Irak3         | 2.3                 | Interleukin-1 receptor-associated kinase 3                               |
| <b>Ligand-dependent nuclear receptor</b> |               |                     |                                                                          |

|                                |               |       |                                                                                         |
|--------------------------------|---------------|-------|-----------------------------------------------------------------------------------------|
| NM_008829                      | Pgr           | 2.31  | Progesterone receptor                                                                   |
| <b>Peptidase</b>               |               |       |                                                                                         |
| AK147232                       | Lnpep         | 3.92  | Leucyl/cystinyl aminopeptidase                                                          |
| AK033182                       | Usp34         | 3.16  | Ubiquitin specific peptidase 34                                                         |
| NM_175225                      | Tasp1         | 2.85  | Taspase, threonine aspartase 1                                                          |
| NM_019564                      | Htra1         | 2.68  | HtrA serine peptidase 1                                                                 |
| NM_145984                      | Prepl         | 2.46  | Prolyl endopeptidase-like                                                               |
| <b>Phosphatase</b>             |               |       |                                                                                         |
| NM_008976                      | <u>Ptpn14</u> | 3.92  | Protein tyrosine phosphatase, non-receptor type 14                                      |
| AK078716                       | Eya3          | 2.36  | Unknown                                                                                 |
| <b>Transcription regulator</b> |               |       |                                                                                         |
| NM_008052                      | Dtx1          | 11.07 | Deltex 1 homolog (Drosophila)                                                           |
| NM_007674                      | Cdx4          | 7.43  | Caudal type homeo box 4                                                                 |
| NM_007548                      | Prdm1         | 4.78  | PR domain containing 1, with ZNF domain                                                 |
| AK035176                       | Trerf1        | 4.76  | Transcriptional regulating factor 1                                                     |
| NM_008266                      | Hoxb1         | 3.45  | Homeo box B1                                                                            |
| NM_153287                      | Axud1         | 3.29  | AXIN1 up-regulated 1                                                                    |
| BC069182                       | Trp73         | 2.98  | Transformation related protein 73                                                       |
| NM_173868                      | St18          | 2.95  | Suppression of tumorigenicity 18                                                        |
| NM_011018                      | Sqstm1        | 2.34  | Sequestosome 1                                                                          |
| NM_028152                      | Mms19l        | 2.18  | MMS19 (MET18 <i>S. cerevisiae</i> )                                                     |
| NM_030887                      | Jundm2        | 2.17  | Jun dimerization protein 2                                                              |
| <b>Transmembrane receptor</b>  |               |       |                                                                                         |
| NM_030682                      | Tlr1          | 3.89  | Toll-like receptor 1                                                                    |
| NM_029770                      | Unc5b         | 2.89  | Unc-5 homolog B ( <i>C. elegans</i> )                                                   |
| AK028345                       | Opcml         | 2.47  | Opioid binding protein/cell adhesion molecule-like                                      |
| NM_011113                      | Plaur         | 2.36  | Plasminogen activator, urokinase receptor                                               |
| Transporter                    |               |       |                                                                                         |
| NM_011867                      | Slc26a4       | 3.42  | Solute carrier family 26, member 4                                                      |
| NM_011990                      | Slc7a11       | 3.36  | Solute carrier family 7 (cationic amino acid transporter, $\gamma^+$ system), member 11 |
| NM_009682                      | Ap3s2         | 2.98  | Adaptor-related protein complex 3, sigma 2 subunit                                      |
| BC087942                       | Snx7          | 2.46  | Sorting nexin 7                                                                         |
| NM_007423                      | Afp           | 2.3   | Alpha fetoprotein                                                                       |
| AK081492                       | Atp6v1h       | 2.11  | Unknown                                                                                 |
| <b>Others</b>                  |               |       |                                                                                         |
| AK042173                       | Pscdbp        | 13.33 | Pleckstrin homology, Sec7 and coiled-coil domains, binding protein                      |
| NM_145827                      | Cias1         | 12.46 | NLR family, pyrin domain containing 3                                                   |
| NM_019656                      | Tspan6        | 10.46 | Tetraspanin 6                                                                           |
| NM_153102                      | Zfp352        | 8.9   | Zinc finger protein 352                                                                 |
| NM_144827                      | Spata20       | 7.99  | Spermatogenesis associated 20                                                           |
| AK047600                       | BC013529      | 7.44  | unknown                                                                                 |
| NM_172991                      | C030048B08Rik | 6.41  | RIKEN cDNA C030048B08 gene                                                              |
| NM_182939                      | Ppp4r2        | 6.09  | Protein phosphatase 4, regulatory subunit 2                                             |
| NM_177056                      | A230078I05Rik | 5.98  | RIKEN cDNA A230078I05 gene                                                              |

|              |               |      |                                                                                                                             |
|--------------|---------------|------|-----------------------------------------------------------------------------------------------------------------------------|
| NM_011892    | Sgcg          | 5.58 | Sarcoglycan, gamma (dystrophin-associated glycoprotein)                                                                     |
| AK053282     | E130006N16Rik | 5.17 | RIKEN cDNA 1110051M20 gene                                                                                                  |
| AK037746     | Ywhaq         | 5.15 | Tyrosine 3-monooxygenase/tryptophan 5-monooxygenase activation protein, theta polypeptide                                   |
| TC1488278    | TC1488278     | 5.07 | Unknown                                                                                                                     |
| AK007013     | 1700086D15Rik | 5.04 | RIKEN cDNA 1700086D15 gene                                                                                                  |
| NM_011627    | Tpbg          | 4.89 | Trophoblast glycoprotein                                                                                                    |
| NM_013473    | Anxa8         | 4.76 | Annexin A8                                                                                                                  |
| XM_910141    | LOC635169     | 4.73 | Unknown                                                                                                                     |
| AT_nX_3      | AT_nX_3       | 4.63 | Unknown                                                                                                                     |
| NM_027265    | 2810004A10Rik | 4.61 | Unknown                                                                                                                     |
| AK081811     | C130078N14    | 4.55 | Hypothetical protein C130078N14                                                                                             |
| NM_009251    | Serpina3g     | 4.55 | Serine (or cysteine) peptidase inhibitor, clade A, member 3G                                                                |
| XM_142262    | Ptchd1        | 4.32 | Unknown                                                                                                                     |
| NM_007392    | Acta2         | 4.29 | Actin, alpha 2, smooth muscle, aorta                                                                                        |
| AK014953     | 4921523P09Rik | 4.2  | RIKEN cDNA 4921523P09 gene                                                                                                  |
| NM_144946    | Neto1         | 3.96 | Neuropilin (NRP) and tolloid (TLL)-like 1                                                                                   |
| NM_008729    | Ctnnd2        | 3.94 | Catenin (cadherin associated protein), delta 2                                                                              |
| NM_001037917 | LOC622976     | 3.86 | Predicted gene, EG622976                                                                                                    |
| NM_181318    | Rasgef1b      | 3.81 | RasGEF domain family, member 1B                                                                                             |
| BC100408     | Smg5          | 3.68 | Smg-5 homolog, nonsense mediated mRNA decay factor (C. elegans)                                                             |
| XM_976628    | LOC665393     | 3.68 | Unknown                                                                                                                     |
| AK086739     | AK086739      | 3.67 | 15 days embryo head cDNA, RIKEN full-length enriched library, clone:D930048M01 product:unclassifiable, full insert sequence |
| NM_172295    | BC037703      | 3.61 | CDNA sequence BC037703                                                                                                      |
| AK020741     | A330107A15Rik | 3.49 | RIKEN cDNA A330107A15 gene                                                                                                  |
| AK171368     |               | 3.46 | Septin 11                                                                                                                   |
| XR_004086    | LOC672982     | 3.44 | Unknown                                                                                                                     |
| NM_009605    | Adipoq        | 3.42 | Adiponectin, C1Q and collagen domain containing                                                                             |
| XM_899951    | 2600011C06Rik | 3.41 | Unknown                                                                                                                     |
| NM_001004167 | LOC432637     | 3.39 | Unknown                                                                                                                     |
| AK169480     | Tinf2         | 3.33 | Terf1 (TRF1)-interacting nuclear factor 2                                                                                   |
| NM_021399    | Bcl11b        | 3.12 | B-cell leukemia/lymphoma 11B                                                                                                |
| XM_203999    | Rapgef2       | 3.11 | Unknown                                                                                                                     |
| NM_010683    | Lame1         | 3.08 | Laminin, gamma 1                                                                                                            |
| NM_133823    | Mmaa          | 3.08 | Methylmalonic aciduria (cobalamin deficiency) type A                                                                        |
| AK088871     | Mbnl1         | 3.07 | Unknown                                                                                                                     |
| AK042672     | A430106J12Rik | 3.01 | Coiled coil domain containing 88A                                                                                           |
| NM_001024619 | Lrrc54        | 3    | Tsukushin                                                                                                                   |
| AK016009     | Prr3          | 2.96 | Proline-rich polypeptide 3                                                                                                  |
| NM_144929    | Rtbdn         | 2.94 | Retbindin                                                                                                                   |
| NM_001001332 | Stfa1         | 2.93 | CDNA sequence BC1179090                                                                                                     |
| NM_019992    | A1586015      | 2.92 | Signal transducing adaptor family member 1                                                                                  |
| AK054191     | 6720456B07Rik | 2.89 | Unknown                                                                                                                     |
| BI151098     | BI151098      | 2.86 | Inositol monophosphatase domain containing 1                                                                                |

|             |               |      |                                                                                                                                        |
|-------------|---------------|------|----------------------------------------------------------------------------------------------------------------------------------------|
| AK005363    | 1500035N22Rik | 2.83 | RIKEN cDNA 1500035N22 gene                                                                                                             |
| NM_025675   | Atpbd4        | 2.83 | ATP binding domain 4                                                                                                                   |
| NM_025697   | 6330409N04Rik | 2.83 | RIKEN cDNA 6330409N04 gene                                                                                                             |
| TC1481003   | TC1481003     | 2.82 | Unknown                                                                                                                                |
| NM_011171   | Procr         | 2.8  | Protein C receptor, endothelial                                                                                                        |
| AK146611    | Krt78         | 2.77 | Keratin 78                                                                                                                             |
| AK045156    | AK045156      | 2.76 | 9.5 days embryo parthenogenote cDNA, RIKEN full-length enriched library, clone:B130041K03 product:unclassifiable, full insert sequence |
| NM_015790   | Icosl         | 2.76 | Icos ligand                                                                                                                            |
| AK082385    | C230043N17Rik | 2.73 | Indoleamine-pyrrole 2,3 dioxygenase-like 1                                                                                             |
| NM_026253   | Lrrc18        | 2.73 | Leucine rich repeat containing 18                                                                                                      |
| NM_031160   | Arl4d         | 2.72 | Unknown                                                                                                                                |
| NM_008331   | Ifit1         | 2.7  | Interferon-induced protein with tetratricopeptide repeats 1                                                                            |
| NM_025753   | 4933425O20Rik | 2.7  | RIKEN cDNA 4933425O20 gene                                                                                                             |
| NM_030097   | 1700034E13Rik | 2.7  | RIKEN cDNA 1700034E13 gene                                                                                                             |
| TC1500867   | TC1500867     | 2.68 | Unknown                                                                                                                                |
| XM_990154   | Flnb          | 2.62 | Unknown                                                                                                                                |
| AK037428    | AK037428      | 2.6  | Unknown                                                                                                                                |
| NM_145950   | BC010311      | 2.6  | Oxidative stress induced growth inhibitor family member 2                                                                              |
| NAP053909-1 | NAP053909-1   | 2.59 | Unknown                                                                                                                                |
| AK006004    | 1700015P03Rik | 2.58 | Unknown                                                                                                                                |
| NM_133739   | Tmem123       | 2.52 | Transmembrane protein 123                                                                                                              |
| NM_028807   | 1200009I06Rik | 2.49 | RIKEN cDNA 1200009I06 gene                                                                                                             |
| BU531328    | BU531328      | 2.47 | Transcribed locus                                                                                                                      |
| NM_011815   | Fyb           | 2.46 | FYN binding protein                                                                                                                    |
| XM_889501   | LOC624957     | 2.46 | Unknown                                                                                                                                |
| NM_027533   | Tspan2        | 2.44 | Tetraspanin 2                                                                                                                          |
| NM_024193   | Nol5a         | 2.42 | Nucleolar protein 5A                                                                                                                   |
| AK013833    | Tob2          | 2.34 | Unknown                                                                                                                                |
| AK020432    | 9430022A07Rik | 2.33 | Potassium large conductance calcium-activated channel, subfamily M, beta member 4                                                      |
| AK029900    | 4931432P07Rik | 2.31 | Unknown                                                                                                                                |
| X12388      | X12388        | 2.31 | Immunoglobulin heavy chain complex                                                                                                     |
| NM_007380   | Abi1          | 2.28 | Abl-interactor 1                                                                                                                       |
| NM_008879   | Lcp1          | 2.27 | Lymphocyte cytosolic protein 1                                                                                                         |
| AK013364    | 2810458H16Rik | 2.19 | Protection of telomeres 1B                                                                                                             |
| NM_007534   | Bcl2a1b       | 2.17 | B-cell leukemia/lymphoma 2 related protein A1b                                                                                         |
| AK052945    | D930001I22Rik | 2.16 | RIKEN cDNA D930001I22 gene                                                                                                             |
| AK011873    | Cct4          | 2.14 | Chaperonin subunit 4 (delta)                                                                                                           |
| NM_172290   | Hnt           | 2.13 | Neurotrimin                                                                                                                            |
| AK164516    | Syncrip       | 2.11 | Synaptotagmin binding, cytoplasmic RNA interacting protein                                                                             |
| AK077970    | Tbc1d9b       | 2.07 | TBC1 domain family, member 9B                                                                                                          |
| NM_011153   | Gsbs          | 2.06 | G substrate                                                                                                                            |

A corrected one-way analysis of variance was used to analyze the microarray data. Genes whose expression levels changed by at least 2-fold or more up-regulated genes ( $P < 0.05$ ) as compared to unstimulated cells were considered to be differentially expressed in a statistically significant manner.
