# Supplementary material
Source: PubMed Central journal article supplement (PMC3232652)
Supplement: supp_79.12.4876_IAI5451-11_ST4.pdf [file supp_79.12.4876_IAI5451-11_ST4.pdf]

**Table S4. Gene transcripts exclusively upregulated in macrophages stimulated with live *Borrelia burgdorferi* (Bb) and added IL-10 after 4 h post-stimulation**

| Gene number                       | Annotation    | Fold change     |                                                          |
|-----------------------------------|---------------|-----------------|----------------------------------------------------------|
|                                   |               | Live Bb + IL-10 | Description/function                                     |
| <b>Cytokine</b>                   |               |                 |                                                          |
| NM_026907                         | Sectm1        | 4.46            | Secreted and transmembrane 1B                            |
| NM_008352                         | Il12b         | 3.15            | Interleukin 12b                                          |
| NM_010554                         | Il1a          | 2.93            | Interleukin 1 alpha                                      |
| NM_009969                         | Csf2          | 2.76            | Colony stimulating factor 2 (granulocyte-macrophage)     |
| NM_021524                         | Pbef1         | 2.62            | Pre-B-cell colony-enhancing factor 1                     |
| <b>Enzyme</b>                     |               |                 |                                                          |
| NM_133779                         | Pigt          | 7.86            | Phosphatidylinositol glycan anchor biosynthesis, class T |
| NM_007409                         | Adh1          | 5.52            | Alcohol dehydrogenase 1 (class I)                        |
| NM_021439                         | Chst11        | 4.27            | Carbohydrate sulfotransferase 11                         |
| NM_007444                         | Amd2          | 3.82            | S-adenosylmethionine decarboxylase 1                     |
| AK036738                          | Aars          | 3.55            | unknown                                                  |
| NM_153168                         | Lars2         | 3.53            | unknown                                                  |
| NM_144903                         | Aldob         | 3.31            | Aldolase 2, B isoform                                    |
| NM_180600                         | Ube2q2        | 3.24            | Ubiquitin-conjugating enzyme E2Q (putative) 2            |
| NM_009763                         | Bst1          | 3.06            | Bone marrow stromal cell antigen 1                       |
| NM_011636                         | Plscr1        | 3.06            | Phospholipid scramblase 1                                |
| NM_009801                         | Car2          | 2.97            | Carbonic anhydrase 2                                     |
| AK032988                          | 5630401D06Rik | 2.95            | Chromodomain helicase DNA binding protein 2              |
| NM_181072                         | Myo1e mean    | 2.77            | Myosin IE                                                |
| AK003078                          | Ube2s         | 2.68            | Ubiquitin-conjugating enzyme E2S                         |
| AK169992                          | AK169992      | 2.6             | Peroxiredoxin 1                                          |
| NM_133777                         | Ube2s         | 2.55            | Ubiquitin-conjugating enzyme E2S                         |
| NM_010476                         | Hsd17b7       | 2.53            | Hydroxysteroid (17-beta) dehydrogenase 7                 |
| NM_010699                         | Ldha          | 2.44            | Lactate dehydrogenase A                                  |
| NM_010442                         | Hmox1         | 2.23            | Heme oxygenase (decycling) 1                             |
| NM_010477                         | Hspd1         | 2.2             | Heat shock protein 1 (chaperonin)                        |
| NM_020494                         | Ddx24         | 2.19            | DEAD (Asp-Glu-Ala-Asp) box polypeptide 24                |
| <b>G-protein coupled receptor</b> |               |                 |                                                          |
| NM_009987                         | Cx3cr1        | 5.29            | Chemokine (C-X3-C) receptor 1                            |
| NM_146718                         | Olfir430      | 4.49            | Olfactory receptor 430                                   |
| NM_146651                         | Olfir1403     | 4.41            | Olfactory receptor 1403                                  |
| NM_146994                         | Olfir201      | 3.87            | Olfactory receptor 201                                   |
| NM_147076                         | Olfir619      | 3.74            | Olfactory receptor 619                                   |
| NM_146998                         | Olfir195      | 3.16            | Olfactory receptor 195                                   |
| X89687                            | Olfir22-ps1   | 3.14            | Olfactory receptor 22, pseudogene 1                      |
| NM_172435                         | P2ry10        | 2.28            | Purinergic receptor P2Y, G-protein coupled 10            |
| NM_147003                         | Olfir139      | 2.24            | Olfactory receptor 139                                   |
| <b>Growth factor</b>              |               |                 |                                                          |
| NM_008175                         | Grn           | 3.42            | Granulin                                                 |
| NM_011057                         | Pdgfb         | 3.18            | Platelet derived growth factor, B polypeptide            |

|              |          |      |                                                                                               |
|--------------|----------|------|-----------------------------------------------------------------------------------------------|
| NM_020263    | Cacna2d2 | 5.02 | <b>Ion channel</b><br>Calcium channel, voltage-dependent, alpha 2/delta subunit 2             |
| AB012393     | Itrp2    | 3.65 | Inositol 1,4,5-triphosphate receptor 2                                                        |
| AK034069     | Gabrb2   | 2.44 | unknown                                                                                       |
| NM_026578    | Nola1    | 2.05 | Nucleolar protein family A, member 1 (H/ACA small nucleolar RNPs)                             |
|              |          |      | <b>Kinase</b>                                                                                 |
| NM_007936    | Epha4    | 5.61 | Eph receptor A4                                                                               |
| NM_011102    | Prkcc    | 5    | Protein kinase C, gamma                                                                       |
| NM_008551    | Mapkapk2 | 4.16 | MAP kinase-activated protein kinase 2                                                         |
| NM_177326    | Pak2     | 2.91 | P21 (CDKN1A)-activated kinase 2                                                               |
| NM_007746    | Map3k8   | 2.75 | Mitogen activated protein kinase kinase kinase 8                                              |
| NM_146145    | Jak1     | 2.75 | Janus kinase 1                                                                                |
| NM_016895    | Ak2      | 2.45 | Adenylate kinase 2                                                                            |
| NM_008847    | Pip5k1b  | 2.33 | Phosphatidylinositol-4-phosphate 5-kinase, type 1 alpha                                       |
| NM_080708    | Bmp2k    | 2.29 | BMP2 inducible kinase                                                                         |
| NM_010693    | Lck      | 2.21 | Lymphocyte protein tyrosine kinase                                                            |
| NM_020021    | Mos      | 2.16 | Moloney sarcoma oncogene                                                                      |
| AK017353     | Csnk1a1  | 2.1  | Casein kinase 1, alpha 1                                                                      |
|              |          |      | <b>Peptidase</b>                                                                              |
| NM_172845    | Adamts4  | 6.6  | A disintegrin-like and metallopeptidase (reprolysin type) with thrombospondin type 1 motif, 4 |
| AK031819     | Vcpip1   | 2.35 | Unknown                                                                                       |
| NM_011909    | Usp18    | 2.07 | Ubiquitin specific peptidase 18                                                               |
|              |          |      | <b>Phosphatase</b>                                                                            |
| NM_173745    | Dusp18   | 5.12 | Dual specificity phosphatase 18                                                               |
| NM_023418    | Pgam1    | 2.28 | Phosphoglycerate mutase 1                                                                     |
|              |          |      | <b>Transcription regulator</b>                                                                |
| AK075660     | Trp53bp1 | 8.37 | Transformation related protein 53 binding protein 1                                           |
| NM_030557    | Mynn     | 5.82 | Myoneurin                                                                                     |
| NM_011641    | Trp63    | 4.31 | Transformation related protein 63                                                             |
| NM_012051    | Etv3     | 4.09 | Ets variant gene 3                                                                            |
| AK136463     | Lass6    | 3.57 | Longevity assurance homolog 6 ( <i>S. cerevisiae</i> )                                        |
| NM_018807    | Plagl2   | 3.04 | Pleiomorphic adenoma gene-like 2                                                              |
| NM_008088    | Gas7     | 3.02 | Growth arrest specific 7                                                                      |
| BC059256     | Notch2   | 2.82 | Notch gene homolog 2 ( <i>Drosophila</i> )                                                    |
| NM_001001176 | Taf9b    | 2.7  | TAF9B RNA polymerase II, TATA box binding protein (TBP)-associated factor                     |
| NM_054089    | Ncoa6ip  | 2.65 | Trimethylguanosine synthase homolog ( <i>S. cerevisiae</i> )                                  |
| NM_139149    | Fus      | 2.51 | Fusion, derived from t(12;16) malignant liposarcoma (human)                                   |
| NM_015753    | Zfx1b    | 2.46 | Zinc finger E-box binding homeobox 2                                                          |
| NM_011751    | Zfp207   | 2.33 | Zinc finger protein 207                                                                       |
| NM_145996    | Arid5a   | 2.29 | AT rich interactive domain 5A (Mrf1 like)                                                     |
| NM_010496    | Id2      | 2.23 | Inhibitor of DNA binding 2                                                                    |
| AK144446     | Pbx1     | 2.21 | Pre B-cell leukemia transcription factor 1                                                    |

|                               |               |       |                                                                                                               |
|-------------------------------|---------------|-------|---------------------------------------------------------------------------------------------------------------|
| NM_019466                     | Dscr1         | 2.17  | Regulator of calcineurin 1                                                                                    |
| NM_011809                     | Ets2          | 2.1   | E26 avian leukemia oncogene 2, 3' domain                                                                      |
| AK020013                      | Ctnnb1        | 2.03  | Catenin (cadherin associated protein), beta 1                                                                 |
| <b>Translation regulator</b>  |               |       |                                                                                                               |
| NM_173363                     | Eif5          | 3.5   | Eukaryotic translation initiation factor 5                                                                    |
| NM_025840                     | Bzw2          | 2.77  | Basic leucine zipper and W2 domains 2                                                                         |
| NM_198303                     | Eif5b         | 2.26  | Eukaryotic translation initiation factor 5B                                                                   |
| NM_010120                     | Eif1a         | 2.14  | Eukaryotic translation initiation factor 1A                                                                   |
| <b>Transmembrane receptor</b> |               |       |                                                                                                               |
| NM_001008700                  | Il4ra         | 5.58  | Interleukin 4 receptor, alpha                                                                                 |
| NM_022723                     | Scube1        | 3.81  | Signal peptide, CUB domain, EGF-like 1                                                                        |
| AK154286                      | Csf2rb1       | 2.53  | Colony stimulating factor 2 receptor, beta, low-affinity (granulocyte-macrophage)                             |
| NM_009841                     | Cd14          | 2.16  | CD14 antigen                                                                                                  |
| NM_133990                     | Il13ra1       | 2.12  | Interleukin 13 receptor, alpha 1                                                                              |
| <b>Transporter</b>            |               |       |                                                                                                               |
| AK047497                      | Tm9sf4        | 6.07  | Transmembrane 9 superfamily protein member 4                                                                  |
| NM_172980                     | Slc28a2       | 4.21  | Solute carrier family 28 (sodium-coupled nucleoside transporter), member 2                                    |
| NM_024406                     | Fabp4         | 3.92  | Fatty acid binding protein 4, adipocyte                                                                       |
| NM_009692                     | Apoa1         | 3.69  | Apolipoprotein A-I                                                                                            |
| NM_011552                     | Tcof1         | 2.27  | Treacher Collins Franceschetti syndrome 1, homolog                                                            |
| AK080543                      | Atp2a2        | 2.26  | ATPase, Ca <sup>++</sup> transporting, cardiac muscle, slow twitch 2                                          |
| NM_177866                     | Catsper4      | 2.11  | Channel, sperm associated 4                                                                                   |
| <b>Other</b>                  |               |       |                                                                                                               |
| AK032804                      | D5Ert579e     | 35.16 | unknown                                                                                                       |
| AK049252                      | -             | 20.39 | ES cells cDNA, RIKEN full-length enriched library, clone:C330017D18 product:unclassifiable, full insert       |
| BC051052                      | Ccar1         | 11.59 | Cell division cycle and apoptosis regulator 1                                                                 |
| AK051598                      | -             | 11.08 | unknown                                                                                                       |
| AT_L_M                        | AT_L_M        | 9.03  | unknown                                                                                                       |
| AK084422                      | -             | 8.4   | Unknown sequence                                                                                              |
| NM_007993                     | Fbn1          | 7.03  | Fibrillin 1                                                                                                   |
| AK050249                      | Mipol1        | 6.7   | Mirror-image polydactyly gene 1 homolog (human)                                                               |
| AK081803                      | Abi2          | 6.58  | Abl-interactor 2                                                                                              |
| NM_021496                     | Pvr13         | 6.37  | Poliovirus receptor-related 3                                                                                 |
| NM_011896                     | Spry1         | 6.15  | Sprouty homolog 1 (Drosophila)                                                                                |
| AK009064                      | 2310001H17Rik | 5.95  | RIKEN cDNA 2310001H17 gene                                                                                    |
| AK035485                      | -             | 5.91  | Adult male urinary bladder cDNA, RIKEN full-length enriched library, clone:9530055M18 product:unclassifiable, |
| AK037854                      | -             | 5.86  | Unknown                                                                                                       |
| NM_171826                     | Cldnd1        | 5.86  | Claudin domain containing 1                                                                                   |
| NM_172706                     | 9330182L06Rik | 5.76  | RIKEN cDNA 9330182L06 gene                                                                                    |
| BY759546/ NM_011119           | Pa2g4         | 5.69  | Proliferation-associated 2G4                                                                                  |
| NM_130886                     | Card14        | 5.54  | Caspase recruitment domain family, member 14                                                                  |
| A_52_P525705                  | -             | 5.46  | Unknown                                                                                                       |

|                    |               |      |                                                                                                                                          |
|--------------------|---------------|------|------------------------------------------------------------------------------------------------------------------------------------------|
| NM_010104          | Edn1          | 5.45 | Endothelin 1                                                                                                                             |
| NM_177079          | 6030445D17Rik | 5.35 | Unknown                                                                                                                                  |
| NM_145369          | Wfdc5         | 5.29 | WAP four-disulfide core domain 5                                                                                                         |
| NM_008440          | Kif1a         | 5.27 | Kinesin family member 1A                                                                                                                 |
| NM_007776          | Crygd         | 5.21 | Crystallin, gamma D                                                                                                                      |
| BC024774           | 2610034M16Rik | 5.08 | RIKEN cDNA 2610034M16 gene                                                                                                               |
| NM_001039146       | B430211C08Rik | 4.88 | RIKEN cDNA B430211C08 gene                                                                                                               |
| NM_029362          | Chmp4b        | 4.8  | Chromatin modifying protein 4B                                                                                                           |
| AK083533           | AK083533      | 4.77 | Expressed sequence AW146242                                                                                                              |
| BC089618           | BC089618      | 4.66 | Predicted gene, OTTMUSG00000000971                                                                                                       |
| AK038135           | Thoc2         | 4.56 | Unknown                                                                                                                                  |
| NM_010778          | Cd46          | 4.55 | CD46 antigen, complement regulatory protein                                                                                              |
| ENSMUST00000064814 |               | 4.42 | Unknown                                                                                                                                  |
| NM_177865          | A430070M19    | 4.34 | Predicted gene, OTTMUSG00000008540                                                                                                       |
| NM_001029868       | Pdzd4         | 4.13 | PDZ domain containing 4                                                                                                                  |
| AK169742           | LOC14433      | 4.11 | Unknown                                                                                                                                  |
| AK040628           | AK040628      | 4.1  | 0 day neonate thymus cDNA, RIKEN full-length enriched library, clone:A430110K16 product:unclassifiable, full insert                      |
| NM_027878          | 1200002N14Rik | 4.05 | RIKEN cDNA 1200002N14 gene                                                                                                               |
| XR_003860          | LOC672434     | 3.99 | unknown                                                                                                                                  |
| AK164505           | Gas2l3        | 3.98 | Growth arrest-specific 2 like 3                                                                                                          |
| NM_030699          | Ntng1         | 3.92 | Netrin G1                                                                                                                                |
| AK032310           | 4930413O22Rik | 3.87 | Centrosome and spindle pole associated protein 1                                                                                         |
| AK047015           | AK047015      | 3.83 | 10 days neonate cerebellum cDNA, RIKEN full-length enriched library, clone:B930011I04 product:unclassifiable, RIKEN cDNA E130014J05 gene |
| AK080016           | AK080016      | 3.7  |                                                                                                                                          |
| NM_008630          | Mt2           | 3.65 | Metallothionein 2                                                                                                                        |
| AT_ssM_RR_5        | AT_ssM_RR_5   | 3.62 | Unknown                                                                                                                                  |
| AK084688           | Wrb           | 3.61 | Tryptophan rich basic protein                                                                                                            |
| NM_134125          | Trip10        | 3.56 | Thyroid hormone receptor interactor 10                                                                                                   |
| XM_130233          | Mnab          | 3.53 | Unknown                                                                                                                                  |
| NM_028044          | Cnn3          | 3.5  | Calponin 3, acidic                                                                                                                       |
| AK041495           | 9330169L03Rik | 3.49 | RIKEN cDNA 9330169L03 gene                                                                                                               |
| NM_001017426       | Jmjd3         | 3.49 | Jumonji domain containing 3                                                                                                              |
| J00623             | J00623        | 3.44 | Unknown                                                                                                                                  |
| NM_001002786       | 9830134C10Rik | 3.33 | RIKEN cDNA 9830134C10 gene                                                                                                               |
| NAP040991-1        | NAP040991-1   | 3.31 | Unknown                                                                                                                                  |
| NM_021893          | Cd274         | 3.31 | CD274 antigen                                                                                                                            |
| XM_991213          | Otud1         | 3.3  | Unknown                                                                                                                                  |
| BC036642           | BC036642      | 3.29 | Mus musculus, clone IMAGE:3371217, mRNA                                                                                                  |
| NM_145133          | T2bp          | 3.28 | Traf2 binding protein                                                                                                                    |
| BC012020           | BC012020      | 3.27 | CDNA clone IMAGE:40049146                                                                                                                |
| NM_145746          | Odf4          | 3.22 | Outer dense fiber of sperm tails 4                                                                                                       |
| XM_486684          | 4930527E24Rik | 3.22 | Unknown                                                                                                                                  |
| AK157824           | Cnot10        | 3.21 | CCR4-NOT transcription complex, subunit 10                                                                                               |

|                     |               |      |                                                                                                                                             |
|---------------------|---------------|------|---------------------------------------------------------------------------------------------------------------------------------------------|
| AK078584            | AK078584      | 3.15 | Unknown                                                                                                                                     |
| BC027262            | Mt1           | 3.15 | Metallothionein 1                                                                                                                           |
| XM_994784           | Sfpq          | 3.12 | Unknown                                                                                                                                     |
| NM_011631           | Hsp90b1       | 3.11 | Heat shock protein 90kDa beta (Grp94), member 1                                                                                             |
| NM_183426           | Stno          | 3.1  | Strawberry notch homolog 2 (Drosophila)                                                                                                     |
| NM_153801           | Srd5a2l2      | 3.09 | Steroid 5 alpha-reductase 2-like 2                                                                                                          |
| AT_ssM_AB_5         | AT_ssM_AB_5   | 3.04 | Unknown                                                                                                                                     |
| NAP112463-1         | NAP112463-1   | 3.03 | Unknown                                                                                                                                     |
| NM_172600           | 6720456H20Rik | 3.01 | RIKEN cDNA 6720456H20 gene                                                                                                                  |
| AF221104            | Kifc5c        | 3    | Kinesin family member C5C                                                                                                                   |
| NM_029595           | Pbp2          | 2.99 | Phosphatidylethanolamine binding protein 2                                                                                                  |
| XM_984911           | LOC666606     | 2.97 | Unknown                                                                                                                                     |
| AK035950            | AK035950      | 2.95 | 16 days neonate cerebellum cDNA, RIKEN full-length enriched library, clone:9630020E20 product:unclassifiable, Androgen binding protein beta |
| NM_203502           | Abpb          | 2.95 | Androgen binding protein beta                                                                                                               |
| BI107163            | LOC628211     | 2.93 | Unknown                                                                                                                                     |
| AK147452            | Snx27         | 2.92 | Sorting nexin family member 27                                                                                                              |
| AT_T_M              | AT_T_M        | 2.92 | Unknown                                                                                                                                     |
| L04961              | Xist          | 2.92 | Inactive X specific transcripts                                                                                                             |
| NM_053088           | Ifitm5        | 2.91 | Interferon induced transmembrane protein 5                                                                                                  |
| XM_885832           | LOC621431     | 2.91 | Unknown                                                                                                                                     |
| AK084846            | Ptbp2         | 2.9  | Polypyrimidine tract binding protein 2                                                                                                      |
| NM_001013816        | LOC434459     | 2.9  | Predicted gene, EG434459                                                                                                                    |
| AT_nB_3             | AT_nB_3       | 2.88 | Unknown                                                                                                                                     |
| TC1443778           | TC1443778     | 2.87 | Unknown                                                                                                                                     |
| AK089809            | AK089809      | 2.84 | EF-hand domain (C-terminal) containing 2                                                                                                    |
| XR_002277           | LOC668978     | 2.84 | Unknown                                                                                                                                     |
| AK088581            | Hist1h1d      | 2.82 | Histone cluster 1, H1d                                                                                                                      |
| ENSMUST00000030808  | ENSMUST000000 | 2.82 | Unknown                                                                                                                                     |
| NAP057940-1         | NAP057940-1   | 2.82 | Unknown                                                                                                                                     |
| NM_178729/ AK159744 | fbx5          | 2.82 | F-box and leucine-rich repeat protein 5                                                                                                     |
| NM_013798           | NM_013798     | 2.81 | Unknown                                                                                                                                     |
| NM_025815           | Cpne8         | 2.8  | Copine VIII                                                                                                                                 |
| AK046043            | ApoL2         | 2.79 | Apolipoprotein L 8                                                                                                                          |
| NM_023876           | Elp4          | 2.78 | Elongation protein 4 homolog (S. cerevisiae)                                                                                                |
| NM_033592           | Pcdhga9       | 2.77 | Protocadherin gamma subfamily A, 12                                                                                                         |
| BC030336            | BC030336      | 2.76 | CDNA sequence BC030336                                                                                                                      |
| AK083897            | -             | 2.75 | 12 days embryo spinal ganglion cDNA, RIKEN full-length enriched library, clone:D130053N18 product:unclassifiable, Protocadherin beta 15     |
| NM_053140           | Pcdhb15       | 2.75 | Protocadherin beta 15                                                                                                                       |
| NM_173383           | Dnd1          | 2.74 | Dead end homolog 1 (zebrafish)                                                                                                              |
| AK019492            | 4632411P08Rik | 2.73 | RIKEN cDNA 4632411P08 gene                                                                                                                  |
| AK079007            | AK079007      | 2.73 | Unknown                                                                                                                                     |
| AT_ssM_TR_5         | AT_ssM_TR_5   | 2.73 | Unknown                                                                                                                                     |
| NM_133833           | Dst           | 2.73 | Dystonin                                                                                                                                    |
| ENSMUST00000072181  | -             | 2.67 | Unknown                                                                                                                                     |

|              |               |      |                                                                                                                                |
|--------------|---------------|------|--------------------------------------------------------------------------------------------------------------------------------|
| U49739       | Myo6          | 2.66 | Myosin VI                                                                                                                      |
| NM_199063    | Ssx9          | 2.65 | Synovial sarcoma, X breakpoint 9                                                                                               |
| TC1445366    | -             | 2.64 | Unknown                                                                                                                        |
| TC1459708    | -             | 2.62 | Unknown                                                                                                                        |
| AK019388     | Hnrpa0        | 2.61 | Heterogeneous nuclear ribonucleoprotein A0                                                                                     |
| AK041645     | -             | 2.61 | 3 days neonate thymus cDNA, RIKEN full-length enriched library, clone:A630026J16 product:unclassifiable, full insert sequence  |
| NM_026054    | 2810474O19Rik | 2.6  | RIKEN cDNA 2810474O19 gene                                                                                                     |
| AK043005     | AK043005      | 2.56 | Unknown                                                                                                                        |
| NM_001012326 | -             | 2.53 | Unknown                                                                                                                        |
| NM_030694    | Ifitm2        | 2.53 | Interferon induced transmembrane protein 2                                                                                     |
| AK017750     | Casc5         | 2.52 | Cancer susceptibility candidate 5                                                                                              |
| AK031098     | AK031098      | 2.52 | Predicted gene, ENSMUSG00000055370                                                                                             |
| AK039077     | AK039077      | 2.52 | Unknown                                                                                                                        |
| NM_019458    | Paf1          | 2.52 | Paf1, RNA polymerase II associated factor, homolog (S. cerevisiae)                                                             |
| AK220487     | Kif1a         | 2.49 | Kinesin family member 1A                                                                                                       |
| NM_001039209 | LOC195531     | 2.49 | Predicted gene, OTTMUSG00000010671                                                                                             |
| NM_033175    | Spr11         | 2.49 | Late cornified envelope 3C                                                                                                     |
| AK031482     | Kif13b        | 2.48 | Kinesin family member 13B                                                                                                      |
| AK045479     | AK045479      | 2.48 | Unknown                                                                                                                        |
| AK132230     | 2610101J03Rik | 2.47 | ESF1, nucleolar pre-rRNA processing protein, homolog (S. cerevisiae)                                                           |
| AK011855     | 2610201A13Rik | 2.46 | RIKEN cDNA 2610201A13 gene                                                                                                     |
| BC052902     | Gdap10        | 2.45 | Ganglioside-induced differentiation-associated-protein 10                                                                      |
| NM_018785    | Prpf40a       | 2.45 | PRP40 pre-mRNA processing factor 40 homolog A (yeast)                                                                          |
| NM_080638    | Mvp           | 2.45 | Major vault protein                                                                                                            |
| NM_152839    | Igj           | 2.45 | Immunoglobulin joining chain                                                                                                   |
| NM_175035    | Gimap5        | 2.44 | GTPase, IMAP family member 5                                                                                                   |
| NM_030201    | Stch          | 2.42 | Stress 70 protein chaperone, microsome-associated, human homolog                                                               |
| NM_153489    | Ubap21        | 2.4  | Ubiquitin associated protein 2-like                                                                                            |
| A_52_P997449 | A_52_P997449  | 2.39 | Unknown                                                                                                                        |
| AK043743     | AK043743      | 2.39 | 10 days neonate cortex cDNA, RIKEN full-length enriched library, clone:A830027F20 product:unclassifiable, full insert sequence |
| NM_172572    | Rhbf2         | 2.39 | Rhomboid 5 homolog 2 (Drosophila)                                                                                              |
| XM_883948    | LOC619750     | 2.39 | Predicted gene, EG619750                                                                                                       |
| NM_001034037 | 1700024G13Rik | 2.38 | RIKEN cDNA 1700024G13 gene                                                                                                     |
| NM_028385    | Setd5         | 2.38 | SET domain containing 5                                                                                                        |
| NM_138744    | Ssx2ip        | 2.38 | Synovial sarcoma, X breakpoint 2 interacting protein                                                                           |
| XM_885873    | Baz1a         | 2.38 | Bromodomain adjacent to zinc finger domain 1A                                                                                  |
| NAP102462-1  | -             | 2.37 | Unknown                                                                                                                        |
| NM_027696    | Mier1         | 2.37 | Mesoderm induction early response 1 homolog (Xenopus laevis)                                                                   |

|                    |               |      |                                                                               |
|--------------------|---------------|------|-------------------------------------------------------------------------------|
| TC1459687          | -             | 2.37 | Unknown                                                                       |
| AK199310           | -             | 2.35 | Coiled-coil domain containing 90A                                             |
| TC1523833          | TC1523833     | 2.35 | Unknown                                                                       |
| AK042296           | Med12l        | 2.33 | Mediator of RNA polymerase II transcription, subunit 12 homolog (yeast)-like  |
| AW122171           | AW122171      | 2.33 | Transcribed locus                                                             |
| ENSMUST00000036208 | -             | 2.33 | Unknown                                                                       |
| NAP060490-1        | -             | 2.32 | Unknown                                                                       |
| NM_029499          | Ms4a4c        | 2.32 | Membrane-spanning 4-domains, subfamily A, member 4C                           |
| NM_019453          | Mefv          | 2.31 | Mediterranean fever                                                           |
| NM_182650          | Hnrpa2b1      | 2.31 | Heterogeneous nuclear ribonucleoprotein A2/B1                                 |
| AK017269           | Mfap3l        | 2.3  | Microfibrillar-associated protein 3-like                                      |
| NM_023731          | Ccdc86        | 2.3  | Coiled-coil domain containing 86                                              |
| NM_011590          | Timm17a       | 2.28 | Translocase of inner mitochondrial membrane 17a                               |
| NM_026130          | Srpr          | 2.27 | Signal recognition particle receptor ('docking protein')                      |
| NM_153074          | Lrrc25        | 2.27 | Leucine rich repeat containing 25                                             |
| NM_199466          | Eml4          | 2.27 | Echinoderm microtubule associated protein like 4                              |
| XM_133543          | Akap13        | 2.27 | A kinase (PRKA) anchor protein 13                                             |
| AK079535           | Wac           | 2.26 | WW domain containing adaptor with coiled-coil                                 |
| NM_007669          | Cdkn1a        | 2.26 | Cyclin-dependent kinase inhibitor 1A (P21)                                    |
| NM_009610          | Actg2         | 2.26 | Actin, gamma 2, smooth muscle, enteric                                        |
| NM_026934          | 2610312B22Rik | 2.24 | Zinc finger CCCH-type containing 15                                           |
| NM_133780          | Tpr           | 2.24 | Translocated promoter region                                                  |
| X59728             | Gas5          | 2.23 | Growth arrest specific 5                                                      |
| NM_030259          | BC003324      | 2.22 | CDNA sequence BC003324                                                        |
| NM_026835          | Ms4a6d        | 2.21 | Membrane-spanning 4-domains, subfamily A, member 6D                           |
| NM_031179          | Sf3b1         | 2.21 | Splicing factor 3b, subunit 1                                                 |
| XR_002509          | LOC385319     | 2.19 | Unknown                                                                       |
| NM_001040401       | D530031C13Rik | 2.15 | Unknown                                                                       |
| AK079190           | AK079190      | 2.14 | Unknown                                                                       |
| AY100450           | Wfikkn2       | 2.14 | WAP, follistatin/kazal, immunoglobulin, kunitz and netrin domain containing 2 |
| A_52_P1021640      | A_52_P1021640 | 2.12 | Unknown                                                                       |
| NM_026989          | Sfrs11        | 2.12 | Splicing factor, arginine/serine-rich 11                                      |
| A_52_P517668       | -             | 2.06 | Unknown                                                                       |

A corrected one-way analysis of variance was used to analyze the microarray data. Genes whose expression levels changed by at least 2-fold or more up-regulated genes ( $P < 0.05$ ) as compared to unstimulated cells were considered to be differentially expressed in a statistically significant manner.
