# Supplementary material
Source: PubMed Central journal article supplement (PMC3232652)
Supplement: supp_79.12.4876_IAI5451-11_ST5.pdf [file supp_79.12.4876_IAI5451-11_ST5.pdf]

**Table S5. Gene transcripts exclusively upregulated in macrophages stimulated with live *Borrelia burgdorferi* (Bb) at 24 h post-stimulation**

| Gene number                       | Annotation | Fold change | Description/function                              |
|-----------------------------------|------------|-------------|---------------------------------------------------|
|                                   |            | Live Bb     |                                                   |
| <b>Cytokine</b>                   |            |             |                                                   |
| NM_031168                         | Il6        | 10.65       | Interleukin 6                                     |
| AK076547                          | AK076547   | 4.39        | unknown                                           |
| NM_021380                         | Il20       | 4.32        | Interleukin 20                                    |
| NM_019932                         | Cxcl4      | 2.21        | Chemokine (C-X-C motif) ligand 4                  |
| <b>Enzyme</b>                     |            |             |                                                   |
| AK044842                          | AK044842   | 7.3         | Phospholipase C, beta 4                           |
| NM_145209                         | Oas11      | 6.6         | 2'-5' oligoadenylate synthetase-like 1            |
| NM_010356                         | Gsta3      | 5.65        | Glutathione S-transferase, alpha 3                |
| NM_021384                         | Rsad2      | 4.76        | Radical S-adenosyl methionine domain containing 2 |
| NM_172689                         | Ddx58      | 4.24        | DEAD (Asp-Glu-Ala-Asp) box polypeptide 58         |
| NM_011866                         | Pde10a     | 4.2         | Phosphodiesterase 10A                             |
| NM_010260                         | Gbp2       | 4.06        | Guanylate nucleotide binding protein 2            |
| AK076333                          | Ganc       | 3.45        | Glucosidase, alpha; neutral C                     |
| NM_010239                         | Fth1       | 3.29        | Ferritin heavy chain 1                            |
| NM_011637                         | Trex1      | 3.27        | Three prime repair exonuclease 1                  |
| NM_145226                         | Oas3       | 3.18        | 2'-5' oligoadenylate synthetase 3                 |
| NM_024198                         | Gpx7       | 2.99        | Glutathione peroxidase 7                          |
| NM_016903                         | Esd        | 2.9         | Esterase D/formylglutathione hydrolase            |
| NM_011854                         | Oas12      | 2.79        | 2'-5' oligoadenylate synthetase-like 2            |
| NM_011227                         | Rab20      | 2.67        | RAB20, member RAS oncogene family                 |
| NM_016676                         | Rab10      | 2.58        | RAB10, member RAS oncogene family                 |
| NM_028803                         | Gbe1       | 2.58        | Glucan (1,4-alpha-), branching enzyme 1           |
| NM_133348                         | Acot7      | 2.48        | Acyl-CoA thioesterase 7                           |
| NM_011408                         | Slfn2      | 2.46        | Schlafen 2                                        |
| NM_007981                         | Acs11      | 2.31        | Acyl-CoA synthetase long-chain family member 1    |
| NM_011034                         | Prdx1      | 2.27        | unknown                                           |
| NM_010927                         | Nos2       | 2.19        | Nitric oxide synthase 2, inducible, macrophage    |
| NM_008102                         | Gch1       | 2.16        | GTP cyclohydrolase 1                              |
| <b>G-protein coupled receptor</b> |            |             |                                                   |
| NM_029573                         | Idh3a      | 2.02        | Isocitrate dehydrogenase 3 (NAD+) alpha           |
| NM_146758                         | Olfir678   | 16.03       | Olfactory receptor 678                            |
| NM_145066                         | Gpr85      | 4.04        | G protein-coupled receptor 85                     |
| NM_017466                         | Ccr12      | 3.79        | Chemokine (C-C motif) receptor-like 2             |
| <b>Growth factor</b>              |            |             |                                                   |
| NM_146488                         | Olfir137   | 3.62        | Olfactory receptor 137                            |
| <b>Ion channel</b>                |            |             |                                                   |
| NM_011819                         | Gdf15      | 2.18        | Growth differentiation factor 15                  |
| <b>Kinase</b>                     |            |             |                                                   |
| NM_024412                         | Clcnka     | 3.39        | Chloride channel Ka                               |
| AK036317                          | Raf1       | 7.41        | V-raf-leukemia viral oncogene 1                   |

|                                |               |             |                                                                                 |
|--------------------------------|---------------|-------------|---------------------------------------------------------------------------------|
| NM_020557                      | Tyki          | 6.43        | Thymidylate kinase family LPS-inducible member                                  |
| <b>NM_172161</b>               | <b>Irak2</b>  | <b>3.02</b> | Interleukin-1 receptor-associated kinase 2                                      |
| NM_001024856                   | Ttbk2         | 2.31        | Tau tubulin kinase 2                                                            |
| NM_008413                      | Jak2          | 2.28        | Janus kinase 2                                                                  |
| NM_024182                      | Riok3         | 2.26        | RIO kinase 3 (yeast)                                                            |
| <b>Peptidase</b>               |               |             |                                                                                 |
| NM_007793                      | Cstb          | 2.03        | Cystatin B                                                                      |
| NM_001013767                   | Capn11        | 4.53        | Calpain 11                                                                      |
| NM_175440                      | Prss27        | 2.76        | Protease, serine 27                                                             |
| BC022737                       | A530088I07Rik | 2.64        | RIKEN cDNA A530088I07 gene                                                      |
| <b>Phosphatase</b>             |               |             |                                                                                 |
| NM_009807                      | Casp1         | 2.22        | Caspase 1                                                                       |
| NM_008976                      | Ptpn14        | 5.16        | Protein tyrosine phosphatase, non-receptor type 14                              |
| NM_008903                      | Ppap2a        | 3.04        | Phosphatidic acid phosphatase 2a                                                |
| NM_022883                      | Lpin3         | 2.97        | Lipin 3                                                                         |
| <b>Transcription regulator</b> |               |             |                                                                                 |
| NM_007387                      | Acp2          | 2.23        | Acid phosphatase 2, lysosomal                                                   |
| NM_010755                      | Maff          | 3.49        | V-maf musculoaponeurotic fibrosarcoma oncogene family, protein F (avian)        |
| NM_010468                      | Hoxd3         | 3.44        | Homeo box D3                                                                    |
| NM_009546                      | Trim25        | 3.22        | Tripartite motif protein 25                                                     |
| NM_008329                      | Ifi204        | 3.03        | Interferon activated gene 204                                                   |
| BC052532                       | BC006779      | 2.79        | CDNA sequence BC006779                                                          |
| NM_007837                      | Ddit3         | 2.65        | DNA-damage inducible transcript 3                                               |
| NM_010908                      | Nfkbib        | 2.57        | Nuclear factor of kappa light chain gene enhancer in B-cells inhibitor, beta    |
| NM_016883                      | Psmc10        | 2.5         | Proteasome (prosome, macropain) 26S subunit, non-ATPase, 10                     |
| NM_010723                      | Lmo4          | 2.42        | LIM domain only 4                                                               |
| NM_177821                      | Ep300         | 2.39        | E1A binding protein p300                                                        |
| NM_007591                      | Calr          | 2.22        | Calreticulin                                                                    |
| NM_010928                      | Notch2        | 2.21        | Notch gene homolog 2 (Drosophila)                                               |
| NM_008601                      | Mitf          | 2.09        | Microphthalmia-associated transcription factor                                  |
| NM_008689                      | Nfkb1         | 2.06        | Nuclear factor of kappa light chain gene enhancer in B-cells 1, p105            |
| Translation regulator          |               |             |                                                                                 |
| NM_018807                      | Plagl2        | 2.03        | Pleiomorphic adenoma gene-like 2                                                |
| Transmembrane receptor         |               |             |                                                                                 |
| NM_013507                      | Eif4g2        | 2.24        | Eukaryotic translation initiation factor 4, gamma 2                             |
| NM_011150                      | Lgals3bp      | 2.64        | Lectin, galactoside-binding, soluble, 3 binding protein                         |
| NM_009259                      | Spn           | 2.46        | Sialophorin                                                                     |
| NM_011113                      | Plaur         | 2.2         | Plasminogen activator, urokinase receptor                                       |
| <b>Transporter</b>             |               |             |                                                                                 |
| NM_023680                      | Tnfrsf22      | 2.18        | Tumor necrosis factor receptor superfamily, member 22                           |
| NM_030683                      | Slc14a2       | 8.3         | Solute carrier family 14 (urea transporter), member 2                           |
| NM_011990                      | Slc7a11       | 5.97        | Solute carrier family 7 (cationic amino acid transporter, y+ system), member 11 |
| NM_013790                      | Abcc5         | 2.85        | ATP-binding cassette, sub-family C (CFTR/MRP), member 5                         |

|                  |               |             |                                                                                                                                                                |
|------------------|---------------|-------------|----------------------------------------------------------------------------------------------------------------------------------------------------------------|
| NM_013612        | Slc11a1       | 2.75        | Solute carrier family 11 (proton-coupled divalent metal ion transporters), member 1                                                                            |
| NM_001012305     | Slc39a12      | 2.62        | Solute carrier family 39 (zinc transporter), member 12                                                                                                         |
| NM_175090        | Slc31a1       | 2.58        | Solute carrier family 31, member 1                                                                                                                             |
| NM_023044        | Slc15a3       | 2.5         | Solute carrier family 15, member 3                                                                                                                             |
| NM_172659        | Slc2a6        | 2.39        | Solute carrier family 2 (facilitated glucose transporter), member 6                                                                                            |
| NM_007423        | Afp           | 2.33        | Alpha fetoprotein                                                                                                                                              |
| <b>Other</b>     |               |             |                                                                                                                                                                |
| NM_027915        | Ap2b1         | 2.16        | Adaptor-related protein complex 2, beta 1 subunit                                                                                                              |
| NM_138671        | Nadk          | 2.17        | NAD kinase                                                                                                                                                     |
| AK032364         | D4Ert478e     | 8.46        | Oxysterol binding protein-like 9                                                                                                                               |
| BC068233         | BC068233      | 8.46        | unknown                                                                                                                                                        |
| NM_011627        | Tpbp          | 7.79        | Trophoblast glycoprotein                                                                                                                                       |
| NM_207238        | Fbxo27        | 7.23        | F-box protein 27                                                                                                                                               |
| AK045754         | AK045754      | 6.66        | unknown                                                                                                                                                        |
| AK046877         | Tshz2         | 6.48        | Teashirt zinc finger family member 2                                                                                                                           |
| NM_178381        | Trp53i5       | 6.3         | Transmembrane protein 16J                                                                                                                                      |
| AK046736         | Fbxo39        | 5.32        | F-box protein 39                                                                                                                                               |
| A_52_P940816     | A_52_P940816  | 5.3         | unknown                                                                                                                                                        |
| AK017269         | Mfap3l1       | 5.19        | Microfibrillar-associated protein 3-like                                                                                                                       |
| NM_025549        | Arrdc4        | 5.03        | Arrestin domain containing 4                                                                                                                                   |
| NM_198635        | LOC333669     | 4.76        | Predicted gene, EG333669                                                                                                                                       |
| NM_023386        | Rtp4          | 4.69        | Receptor transporter protein 4                                                                                                                                 |
| AK035387         | 9530028C05    | 4.6         | Sterile alpha motif domain containing 9-like                                                                                                                   |
| AK031754         | C130092O11Rik | 4.59        | RIKEN cDNA C130092O11 gene                                                                                                                                     |
| AK085249         | AK085249      | 4.41        | Predicted gene, ENSMUSG00000054178                                                                                                                             |
| AK050750         | AK050750      | 4.39        | 9 days embryo whole body cDNA, RIKEN full-length enriched library, clone:D030015J17 product:serine/threonine kinase 13 (aurora/IPL-like), full insert sequence |
| NM_001008427     | LOC434179     | 4.38        | Predicted gene, EG434179                                                                                                                                       |
| NM_010259        | Gbp1          | 4.38        | Guanylate nucleotide binding protein 1                                                                                                                         |
| AK084077         | AK084077      | 4.28        | unknown                                                                                                                                                        |
| AK015510         | 4930465M20Rik | 4.16        | RIKEN cDNA 4930465M20 gene                                                                                                                                     |
| NM_009805        | Cflar         | 4.03        | CASP8 and FADD-like apoptosis regulator                                                                                                                        |
| <b>NM_008331</b> | <b>Ifit1</b>  | <b>4.02</b> | Interferon-induced protein with tetratricopeptide repeats 1                                                                                                    |
| NM_198176        | Fastkd5       | 3.97        | FAST kinase domains 5                                                                                                                                          |
| NM_007535        | Bcl2a1c       | 3.95        | B-cell leukemia/lymphoma 2 related protein A1c                                                                                                                 |
| NM_009920        | Cnih2         | 3.94        | Cornichon homolog 2 (Drosophila)                                                                                                                               |
| AK081000         | E230024E03Rik | 3.83        | RIKEN cDNA E230024E03 gene                                                                                                                                     |
| AK010122         | 2310069B03Rik | 3.82        | unknown                                                                                                                                                        |
| AB010317         | AB010317      | 3.78        | unknown                                                                                                                                                        |
| AK030769         | Rab11fip1     | 3.72        | RAB11 family interacting protein 1 (class I)                                                                                                                   |
| AK046529         | Ptcd2         | 3.58        | Adult male adrenal gland cDNA, RIKEN full-length enriched library, clone:B330013C06 product:unclassifiable, full insert sequence                               |
| NAP102122-1      | NAP102122-1   | 3.56        | unknown                                                                                                                                                        |
| NAP007796-001    | NAP007796-001 | 3.54        | unknown                                                                                                                                                        |

|                    |                    |      |                                                                                                                                        |
|--------------------|--------------------|------|----------------------------------------------------------------------------------------------------------------------------------------|
| NM_133871          | Ifi44              | 3.43 | Interferon-induced protein 44                                                                                                          |
| NM_008528          | Blnk               | 3.39 | B-cell linker                                                                                                                          |
| U89435             | Nup188             | 3.39 | Nucleoporin 188                                                                                                                        |
| AK006923           | 1700069L16Rik      | 3.21 | RIKEN cDNA 1700069L16 gene                                                                                                             |
| NM_145153          | Oas1f              | 3.19 | 2'-5' oligoadenylate synthetase 1F                                                                                                     |
| AK042825           | AK042825           | 3.18 | unknown                                                                                                                                |
| NM_008655          | Gadd45b            | 3.16 | Growth arrest and DNA-damage-inducible 45 beta                                                                                         |
| NM_183177          | BC052046           | 3.16 | Zinc finger protein 811                                                                                                                |
| AK033743           | Lcn6               | 3.14 | Lipocalin 6                                                                                                                            |
| AK048646           | AK048646           | 3.14 | unknown                                                                                                                                |
| BC025186           | LOC628856          | 3.11 | Predicted gene, ENSMUSG00000053531                                                                                                     |
| NM_175326          | D330045A20Rik      | 2.99 | RIKEN cDNA D330045A20 gene                                                                                                             |
| AB041806           | AB041806           | 2.97 | Hypothetical protein, MNCb-2457                                                                                                        |
| TC1471783          | TC1471783          | 2.95 | unknown                                                                                                                                |
| NM_148925          | Fyco1              | 2.94 | FYVE and coiled-coil domain containing 1                                                                                               |
| XM_203999          | Rapgef2            | 2.92 | unknown                                                                                                                                |
| NM_011171          | Procr              | 2.91 | Protein C receptor, endothelial                                                                                                        |
| NM_019992          | AI586015           | 2.91 | Signal transducing adaptor family member 1                                                                                             |
| AV030849           | AV030849           | 2.9  | unknown                                                                                                                                |
| XM_977926          | Ggps1              | 2.9  | unknown                                                                                                                                |
| NM_029145          | Rnase10            | 2.88 | Ribonuclease, RNase A family, 10 (non-active)                                                                                          |
| NM_199015          | D14Ert668e         | 2.81 | DNA segment, Chr 14, ERATO Doi 668, expressed                                                                                          |
| AK044390           | AK044390           | 2.8  | unknown                                                                                                                                |
| NM_009896          | Socs1              | 2.79 | Suppressor of cytokine signaling 1                                                                                                     |
| NM_011426          | Siglec1            | 2.79 | Sialic acid binding Ig-like lectin 1, sialoadhesin                                                                                     |
| AK083897           | AK083897           | 2.78 | 12 days embryo spinal ganglion cDNA, RIKEN full-length enriched library, clone:D130053N18 product:unclassifiable, full insert sequence |
| AK087910           | D130020L05Rik      | 2.77 | SMEK homolog 1, suppressor of mek1 (Dictyostelium)                                                                                     |
| ENSMUST00000016144 | ENSMUST00000016144 | 2.76 | unknown                                                                                                                                |
| AK011495           | Lman1              | 2.74 | Lectin, mannose-binding, 1                                                                                                             |
| NM_011191          | Psme2b-ps          | 2.71 | unknown                                                                                                                                |
| NM_001029892       | MGC107415          | 2.68 | unknown                                                                                                                                |
| NM_001040005       | D11Ert759e         | 2.68 | Ring finger protein 213                                                                                                                |
| NM_146097          | Cbwd1              | 2.64 | COBW domain containing 1                                                                                                               |
| NM_019914          | Mllt11             | 2.63 | Myeloid/lymphoid or mixed-lineage leukemia (trithorax homolog, Drosophila); translocated to, 11                                        |
| NM_008909          | Ppl                | 2.61 | Periplakin                                                                                                                             |
| NM_027649          | Spats1             | 2.6  | Spermatogenesis associated, serine-rich 1                                                                                              |
| NM_203507          | Rwdd4a             | 2.57 | RWD domain containing 4A                                                                                                               |
| NAP063869-1        | NAP063869-1        | 2.56 | unknown                                                                                                                                |
| NM_001039530       | Parp14             | 2.55 | Poly (ADP-ribose) polymerase family, member 14                                                                                         |
| NM_010807          | Marcks11           | 2.53 | MARCKS-like 1                                                                                                                          |
| NM_007534          | Bcl2a1b            | 2.52 | B-cell leukemia/lymphoma 2 related protein A1b                                                                                         |
| BC076612           | 3110043O21Rik      | 2.51 | RIKEN cDNA 3110043O21 gene                                                                                                             |
| NM_031367          | H28                | 2.47 | Histocompatibility 28                                                                                                                  |

|              |               |      |                                                                         |
|--------------|---------------|------|-------------------------------------------------------------------------|
| NM_009099    | Trim30        | 2.45 | Tripartite motif protein 30                                             |
| A_52_P214516 | A_52_P214516  | 2.42 | unknown                                                                 |
| NM_029714    | 1700067C01Rik | 2.41 | RIKEN cDNA 1700067C01 gene                                              |
| NM_145950    | BC010311      | 2.41 | Oxidative stress induced growth inhibitor family member 2               |
| NM_172603    | Phf11         | 2.41 | PHD finger protein 11                                                   |
| NM_008210    | H3f3a         | 2.4  | H3 histone, family 3A                                                   |
| NM_025431    | 1190005P17Rik | 2.39 | RIKEN cDNA 1190005P17 gene                                              |
| NM_029000    | Gvin1         | 2.37 | GTPase, very large interferon inducible 1                               |
| NM_030259    | BC003324      | 2.36 | CDNA sequence BC003324                                                  |
| NAP045112-1  | NAP045112-1   | 2.34 | unknown                                                                 |
| NM_198001    | 1110008P14Rik | 2.34 | RIKEN cDNA 1110008P14 gene                                              |
| NM_026719    | Lmbrd1        | 2.32 | LMBR1 domain containing 1                                               |
| AK041358     | Dfna5h        | 2.29 | Deafness, autosomal dominant 5 homolog (human)                          |
| BC056356     | LOC381508     | 2.27 | Similar to RIKEN cDNA 2610524H06 gene                                   |
| NAP025806-1  | NAP025806-1   | 2.25 | unknown                                                                 |
| NM_153058    | Mapre2        | 2.24 | Microtubule-associated protein, RP/EB family, member 2                  |
| AK043880     | C630043F03Rik | 2.2  | RIKEN cDNA C630043F03 gene                                              |
| NM_022310    | Hspa5         | 2.17 | Heat shock protein 5                                                    |
| NM_013562    | Ifrd1         | 2.16 | Interferon-related developmental regulator 1                            |
| AK032921     | AK032921      | 2.14 | unknown                                                                 |
| NM_011743    | Zfp106        | 2.13 | Zinc finger protein 106                                                 |
| BC004622     | Gas5          | 2.11 | Growth arrest specific 5                                                |
| NM_026031    | Utp111        | 2.09 | UTP11-like, U3 small nucleolar ribonucleoprotein, (yeast)               |
| XM_283757    | Rtf1          | 2.09 | Rtf1, Paf1/RNA polymerase II complex component, homolog (S. cerevisiae) |
| NM_053158    | Mrp11         | 2.04 | Mitochondrial ribosomal protein L1                                      |

---

A corrected one-way analysis of variance was used to analyze the microarray data. Genes whose expression levels changed by at least 2-fold or more up-regulated genes ( $P < 0.05$ ) as compared to unstimulated cells were considered to be differentially expressed in a statistically significant manner.
