# Supplementary material
Source: PubMed Central journal article supplement (PMC3232652)
Supplement: supp_79.12.4876_IAI5451-11_ST6.pdf [file supp_79.12.4876_IAI5451-11_ST6.pdf]

**Table S6. Gene transcripts exclusively upregulated in macrophages stimulated with live *Borrelia burgdorferi* (Bb) with added IL-10 at 24 h post-stimulation**

| Gene number  | Annotation | Fold change     |                                                                                                                              |
|--------------|------------|-----------------|------------------------------------------------------------------------------------------------------------------------------|
|              |            | Live Bb + IL-10 | Description/function                                                                                                         |
|              |            |                 | <b>Cytokine</b>                                                                                                              |
| NM_008117    | Gh         | 4.07            | Growth hormone                                                                                                               |
| NM_021443    | Ccl8       | 3.24            | Chemokine (C-C motif) ligand 8                                                                                               |
| NM_010798    | Mif        | 2.23            | Macrophage migration inhibitory factor                                                                                       |
|              |            |                 | <b>Enzyme</b>                                                                                                                |
| NM_010283    | Ggta1      | 7.15            | Glycoprotein galactosyltransferase alpha 1, 3                                                                                |
| NM_021715    | Chst7      | 6.6             | Carbohydrate (N-acetylglucosamino) sulfotransferase 7                                                                        |
| AK002747     | Galnt14    | 5.97            | UDP-N-acetyl-alpha-D-galactosamine:polypeptide N-acetylgalactosaminyltransferase 14                                          |
| NM_170597    | Creg2      | 4.21            | Cellular repressor of E1A-stimulated genes 2                                                                                 |
| NM_025972    | Asah1      | 3.97            | N-acylsphingosine amidohydrolase (acid ceramidase)-like                                                                      |
| NM_028810    | Rnd3       | 3.77            | Rho family GTPase 3                                                                                                          |
| AK029782     | Ust        | 3.55            | Uronyl-2-sulfotransferase                                                                                                    |
| NM_001007465 | Rffl       | 3.27            | Ring finger and FYVE like domain containing protein                                                                          |
| NM_030718    | Abo        | 2.92            | ABO blood group (transferase A, alpha 1-3-N-acetylgalactosaminyltransferase, transferase B, alpha 1-3-galactosyltransferase) |
| NM_175562    | Rab39      | 2.77            | RAB39, member RAS oncogene family                                                                                            |
| NM_172612    | Rnd1       | 2.72            | Rho family GTPase 1                                                                                                          |
| NM_133685    | Rab31      | 2.55            | RAB31, member RAS oncogene family                                                                                            |
| NM_019946    | Mgst1      | 2.54            | Microsomal glutathione S-transferase 1                                                                                       |
| AK035758     | Car10      | 2.53            | Carbonic anhydrase 10                                                                                                        |
| CJ326049     | CJ326049   | 2.48            | Transcribed locus                                                                                                            |
| NM_026713    | Mogat1     | 2.44            | Monoacylglycerol O-acyltransferase 1                                                                                         |
| NM_007814    | Cyp2b19    | 2.42            | Cytochrome P450, family 2, subfamily b, polypeptide 19                                                                       |
| NM_009008    | Rac2       | 2.42            | RAS-related C3 botulinum substrate 2                                                                                         |
| NM_010027    | Ddt        | 2.37            | D-dopachrome tautomerase                                                                                                     |
| NM_023121    | Gngt2      | 2.36            | Guanine nucleotide binding protein (G protein), gamma transducing activity polypeptide 2                                     |
| NM_029466    | Arl5b      | 2.36            | ADP-ribosylation factor-like 5B                                                                                              |
|              |            |                 | <b>G-protein coupled receptor</b>                                                                                            |
| NM_146924    | Olf476     | 5.41            | Olfactory receptor 476                                                                                                       |
| NM_008039    | Fpr-rs2    | 5.05            | Formyl peptide receptor, related sequence 2                                                                                  |
| NM_008286    | Hrh2       | 3.65            | Histamine receptor H 2                                                                                                       |
| NM_147038    | Olf1416    | 3.61            | Olfactory receptor 1416                                                                                                      |
| NM_008965    | Ptger4     | 2.92            | Prostaglandin E receptor 4 (subtype EP4)                                                                                     |
|              |            |                 | <b>Growth factor</b>                                                                                                         |
| NM_022024    | Gmfg       | 2.31            | Glia maturation factor, gamma                                                                                                |
|              |            |                 | <b>Ion channel</b>                                                                                                           |
| AK014626     | Kcnk16     | 4.6             | Potassium channel, subfamily K, member 16                                                                                    |
| NM_007583    | Cacng2     | 3.63            | Calcium channel, voltage-dependent, gamma subunit 2                                                                          |
| NM_016691    | Clcn5      | 3.05            | Chloride channel 5                                                                                                           |

|              |               |      |                                                                                                    |
|--------------|---------------|------|----------------------------------------------------------------------------------------------------|
| NM_031169    | Kcnmb1        | 2.66 | Potassium large conductance calcium-activated channel, subfamily M, beta member 1<br><b>Kinase</b> |
| NM_133232    | Pfkfb3        | 3.11 | 6-phosphofructo-2-kinase/fructose-2,6-biphosphatase 3                                              |
| NM_138952    | Ripk2         | 2.91 | Receptor (TNFRSF)-interacting serine-threonine kinase 2                                            |
| NM_010747    | Lyn           | 2.83 | Yamaguchi sarcoma viral (v-yes-1) oncogene homolog                                                 |
| NM_021606    | Nek6          | 2.39 | NIMA (never in mitosis gene a)-related expressed kinase 6                                          |
| NM_144549    | Trib1         | 2.33 | Tribbles homolog 1 (Drosophila)                                                                    |
| NM_008828    | Pgk1          | 2.18 | Phosphoglycerate kinase 1<br><b>Ligand-dependent nuclear receptor</b>                              |
| NM_013839    | Nr1h3         | 3.02 | Nuclear receptor subfamily 1, group H, member 3<br><b>Peptidase</b>                                |
| NM_009170    | Shh           | 3.94 | Sonic hedgehog                                                                                     |
| NM_008198    | Cfb           | 3.35 | Complement factor B                                                                                |
| NM_199019    | 4933407P14Rik | 3.19 | RIKEN cDNA 4933407P14 gene                                                                         |
| NM_009984    | Ctsl          | 2.67 | Cathepsin L                                                                                        |
| NM_007801    | Ctsh          | 2.5  | Cathepsin H<br>Phosphatase                                                                         |
| NM_008984    | Ptpm          | 3.9  | Protein tyrosine phosphatase, receptor type, M                                                     |
| NM_013642    | Dusp1         | 3.14 | Dual specificity phosphatase 1<br><b>Transcription regulator</b>                                   |
| AK007371     | Mbd1          | 4.08 | Methyl-CpG binding domain protein 1                                                                |
| NM_144933    | Crsp6         | 3.1  | Mediator complex subunit 17                                                                        |
| XM_884335    | Ankrd57       | 2.98 | unknown                                                                                            |
| NM_008093    | Gata5         | 2.94 | GATA binding protein 5                                                                             |
| XM_001001171 | Trip11        | 2.79 | Thyroid hormone receptor interactor 11                                                             |
| NM_011691    | Vav1          | 2.37 | Vav 1 oncogene                                                                                     |
| NM_010118    | Egr2          | 2.29 | Early growth response 2                                                                            |
| NM_011138    | Pou2f2        | 2.28 | POU domain, class 2, transcription factor 2                                                        |
| AK033622     | Foxp1         | 2.26 | Forkhead box P1<br><b>Transmembrane receptor</b>                                                   |
| NM_144559    | Fcgr3a        | 4.75 | Fc receptor, IgG, low affinity IV                                                                  |
| NM_010187    | Fcgr2b        | 2.92 | Fc receptor, IgG, low affinity IIb                                                                 |
| NM_007782    | Csf3r         | 2.91 | Colony stimulating factor 3 receptor (granulocyte)                                                 |
| NM_007781    | Csf2rb2       | 2.76 | Colony stimulating factor 2 receptor, beta 2, low-affinity (granulocyte-macrophage)                |
| NM_025422    | Cd302         | 2.64 | CD302 antigen                                                                                      |
| NM_011682    | Utrn          | 2.49 | Utrophin<br><b>Transporter</b>                                                                     |
| NM_010288    | Gja1          | 4.3  | Gap junction protein, alpha 1                                                                      |
| NM_008120    | Gja4          | 4.18 | Gap junction protein, alpha 4                                                                      |
| NM_013851    | Abca8b        | 3.45 | ATP-binding cassette, sub-family A (ABC1), member 8b                                               |
| NM_009196    | Slc16a1       | 2.66 | Solute carrier family 16 (monocarboxylic acid transporters), member 1                              |
| NM_009695    | Apoc2         | 2.66 | Apolipoprotein C-II                                                                                |
| NM_011405    | Slc7a7        | 2.48 | Solute carrier family 7 (cationic amino acid transporter, y+ system), member 7                     |
| NM_145447    | BC011209      | 2.08 | Feline leukemia virus subgroup C cellular receptor family, member 2                                |

|                  |                |      |
|------------------|----------------|------|
| NAP039233-1      | NAP039233-1    | 2.35 |
| BC028285         | Aipl1          | 12.1 |
| AK013346         | 2810454L23Rik  | 9.74 |
| AK011567         | 2610027H17Rik  | 9.67 |
| AT_nC_5          | AT_nC_5        | 8.03 |
| NM_009566        | Zfp92          | 7.58 |
| XM_619639        | Tns1           | 7.58 |
| A_52_P541760     | A_52_P541760   | 6.98 |
| XM_001002573     | 4930438A08Rik  | 6.68 |
| ENSMUST00000037  | ENSMUST0000003 | 6.52 |
| AK030336         | Chn2           | 6.5  |
| NM_021469        | Dysf           | 6.28 |
| NM_175188        |                | 5.44 |
| AK033846         | AK033846       | 5.39 |
| AK030167         | Brd8           | 5.24 |
| XM_129603        | Tdrd5          | 5.03 |
| NM_153518        | Ccdc65         | 4.72 |
| NM_010734/M18187 | Lst1           | 4.51 |
| AK034923         | AK034923       | 4.5  |
| EQC              | (+)eQC-40      | 4.41 |
| A_51_P144143     | A_51_P144143   | 4.38 |
| NM_013650        | S100a8         | 4.37 |
| NM_001029933     | Zfp114         | 4.36 |
| NM_027222        | 2010001M09Rik  | 4.04 |
| BC009088         | Pvr12          | 3.96 |
| AK040647         | AK040647       | 3.83 |
| NM_144552        | Stxbp6         | 3.79 |
| NM_153159        | Zc3h12a        | 3.76 |
| NM_027919        | Tha1           | 3.66 |
| NAP042178-1      | NAP042178-1    | 3.63 |
| NM_011095        | Lilrb3         | 3.59 |
| NM_018790        | Arc            | 3.59 |
| NM_153115        | Spag11         | 3.54 |
| XM_355437        | LOC381484      | 3.49 |
| NM_011612        | Tnfrsf9        | 3.38 |
| NM_010488        | Elavl4         | 3.36 |
| NM_174847        | 5830404H04Rik  | 3.36 |
| AK054477         | AK054477       | 3.35 |
| TC1493753        | TC1493753      | 3.35 |
| BC061017         | 1700009P17Rik  | 3.32 |
| NM_175181        | 2600010E01Rik  | 3.31 |
| NM_023742        | Dtx2           | 3.29 |

#### Other

|                                                                                                                                            |
|--------------------------------------------------------------------------------------------------------------------------------------------|
| unknown                                                                                                                                    |
| Aryl hydrocarbon receptor-interacting protein-like 1                                                                                       |
| RIKEN cDNA 2810454L23 gene                                                                                                                 |
| RIKEN cDNA 2610027H17 gene                                                                                                                 |
| unknown                                                                                                                                    |
| Zinc finger protein 92                                                                                                                     |
| Tensin 1                                                                                                                                   |
| unknown                                                                                                                                    |
| unknown                                                                                                                                    |
| unknown                                                                                                                                    |
| Chimerin (chimaerin) 2                                                                                                                     |
| Dysferlin                                                                                                                                  |
| Membrane-associated ring finger (C3HC4) 1                                                                                                  |
| Adult male epididymis cDNA, RIKEN full-length enriched library, clone:9230119B03 product:unclassifiable, full insert sequence              |
| RIKEN cDNA 4933408B17 gene                                                                                                                 |
| Tudor domain containing 5                                                                                                                  |
| Coiled-coil domain containing 65                                                                                                           |
| Leukocyte specific transcript 1                                                                                                            |
| RIKEN cDNA 9530091C08 gene                                                                                                                 |
| unknown                                                                                                                                    |
| unknown                                                                                                                                    |
| S100 calcium binding protein A8 (calgranulin A)                                                                                            |
| Zinc finger protein 114                                                                                                                    |
| RIKEN cDNA 2010001M09 gene                                                                                                                 |
| Poliovirus receptor-related 2                                                                                                              |
| Polycomb group ring finger 5                                                                                                               |
| Syntaxin binding protein 6 (amisyn)                                                                                                        |
| Zinc finger CCCH type containing 12A                                                                                                       |
| Threonine aldolase 1                                                                                                                       |
| unknown                                                                                                                                    |
| Leukocyte immunoglobulin-like receptor, subfamily B (with TM and ITIM domains), member 3                                                   |
| Activity regulated cytoskeletal-associated protein                                                                                         |
| Sperm associated antigen 11                                                                                                                |
| unknown                                                                                                                                    |
| Tumor necrosis factor receptor superfamily, member 9                                                                                       |
| ELAV (embryonic lethal, abnormal vision, Drosophila)-like 4 (Hu antigen D)                                                                 |
| RIKEN cDNA 5830404H04 gene                                                                                                                 |
| 2 days pregnant adult female ovary cDNA, RIKEN full-length enriched library, clone:E330029M15 product:unclassifiable, full insert sequence |
| unknown                                                                                                                                    |
| RIKEN cDNA 1700009P17 gene                                                                                                                 |
| RIKEN cDNA 2600010E01 gene                                                                                                                 |
| Deltex 2 homolog (Drosophila)                                                                                                              |

|                  |                 |      |                                                                       |
|------------------|-----------------|------|-----------------------------------------------------------------------|
| NM_145523        | Gca             | 3.12 | Grancalcin                                                            |
| BC022713         | BC022713        | 3.1  | CDNA sequence BC022713                                                |
| E1A_r60_a107     | (+)E1A_r60_a107 | 3.09 | unknown                                                               |
| NM_007969        | Expi            | 3.08 | Extracellular proteinase inhibitor                                    |
| BC004022         | BC004022        | 3.03 | CDNA sequence BC004022                                                |
| AK080472         | Zfp711          | 3.02 | unknown                                                               |
| AK018520         | 9030420J04Rik   | 2.93 | unknown                                                               |
| EQC              | (+)eQC-42       | 2.92 | unknown                                                               |
| NM_177723        | A030011M19      | 2.89 | V-set and immunoglobulin domain containing 8                          |
| XM_132975        | C730024G19Rik   | 2.88 | Antagonist of mitotic exit network 1 homolog ( <i>S. cerevisiae</i> ) |
| NM_011420        | Smn1            | 2.84 | Survival motor neuron 1                                               |
| AK006376         | 1700026D11Rik   | 2.81 | RIKEN cDNA 1700026D11 gene                                            |
| NM_178682        | 4933426M11Rik   | 2.78 | RIKEN cDNA 4933426M11 gene                                            |
| BC022654         | BC022654        | 2.75 | Mus musculus, clone IMAGE:4219318, mRNA                               |
| AK016501         | 4931432M23Rik   | 2.74 | RIKEN cDNA 4931432M23 gene                                            |
| CB182661         | CB182661        | 2.74 | Transcribed locus                                                     |
| NM_028732        | 4632428N05Rik   | 2.72 | RIKEN cDNA 4632428N05 gene                                            |
| S79463           | Sema4c          | 2.71 | unknown                                                               |
| AK050745         | AK050745        | 2.66 | unknown                                                               |
| NM_001033632     | Ifitm6          | 2.62 | Interferon induced transmembrane protein 6                            |
| NAP120816-001    | NAP120816-001   | 2.61 | unknown                                                               |
| NM_028718        | Traf3ip1        | 2.6  | TNF receptor-associated factor 3 interacting protein 1                |
| NM_025357        | Smpx            | 2.56 | Small muscle protein, X-linked                                        |
| NM_183223        | BC107364        | 2.56 | unknown                                                               |
| NM_001001495     | 9030611K07Rik   | 2.55 | TNFAIP3 interacting protein 3                                         |
| NM_025582        | 2810405K02Rik   | 2.54 | RIKEN cDNA 2810405K02 gene                                            |
| NM_025681        | Lix1            | 2.53 | Limb expression 1 homolog (chicken)                                   |
| NM_172579        | Sipa111         | 2.52 | Signal-induced proliferation-associated 1 like 1                      |
| NM_145158        | Emilin2         | 2.49 | Elastin microfibril interfacier 2                                     |
| NM_153533        | Tenc1           | 2.49 | Tensin like C1 domain-containing phosphatase                          |
| NM_008929        | Dnajc3          | 2.46 | DnaJ (Hsp40) homolog, subfamily C, member 3A                          |
| NM_026073        | Rab15           | 2.44 | RAB, member of RAS oncogene family-like 5                             |
| XM_977942        | 1700084E18Rik   | 2.44 | RIKEN cDNA 1700084E18 gene                                            |
| NM_019549        | Plek            | 2.43 | Pleckstrin                                                            |
| NM_022324        | Sdf211          | 2.4  | Stromal cell-derived factor 2-like 1                                  |
| NM_028968        | Ifitm7          | 2.39 | Interferon induced transmembrane protein 7                            |
| NM_172267        | Phyhd1          | 2.39 | Phytanoyl-CoA dioxygenase domain containing 1                         |
| AK084982         | AK084982        | 2.37 | Hypothetical protein LOC100043793                                     |
| NM_139308        | Stard7          | 2.37 | START domain containing 7                                             |
| NM_011245        | Rasgrf1         | 2.36 | RAS protein-specific guanine nucleotide-releasing factor 1            |
| NM_031997        | Tmem2           | 2.36 | Transmembrane protein 2                                               |
| NM_026667        | 9130005N14Rik   | 2.32 | RIKEN cDNA 9130005N14 gene                                            |
| NM_026454/AK0305 | Ube2f           | 2.29 | Ubiquitin-conjugating enzyme E2F (putative)                           |
| NM_021395        | Hyou1           | 2.27 | Hypoxia up-regulated 1                                                |
| NM_028185        | Lsm11           | 2.27 | U7 snRNP-specific Sm-like protein LSM11                               |

|                        |                        |      |                                                                                                                              |
|------------------------|------------------------|------|------------------------------------------------------------------------------------------------------------------------------|
| NM_133206              | Znrf1                  | 2.27 | Zinc and ring finger 1                                                                                                       |
| BC072593               | Sipa1l2                | 2.24 | Signal-induced proliferation-associated 1 like 2                                                                             |
| NM_199365              | 5330438I03Rik          | 2.24 | unknown                                                                                                                      |
| DCP_20_0               | DCP_20_0               | 2.23 | unknown                                                                                                                      |
| NM_153504              | Rnfl83                 | 2.23 | Ring finger protein 183                                                                                                      |
| AK044953               | Dock1                  | 2.22 | Dedicator of cyto-kinesis 1                                                                                                  |
| NM_026208              | 1700019N19Rik          | 2.22 | RIKEN cDNA 1700019N19 gene                                                                                                   |
| AK040362               | AK040362               | 2.18 | 0 day neonate thymus cDNA, RIKEN full-length enriched library, clone:A430088P17 product:unclassifiable, full insert sequence |
| AK042786               | Dgcr2                  | 2.16 | DiGeorge syndrome critical region gene 2                                                                                     |
| AK082385               | C230043N17Rik          | 2.16 | Indoleamine-pyrole 2,3 dioxygenase-like 1                                                                                    |
| NM_199313              | AY053573               | 2.16 | CDNA sequence AY053573                                                                                                       |
| XM_357752              | LOC384622              | 2.16 | Predicted gene, EG384622                                                                                                     |
| NM_010851              | Myd88                  | 2.13 | Myeloid differentiation primary response gene 88                                                                             |
| NM_011370              | Cyfip1                 | 2.13 | Cytoplasmic FMR1 interacting protein 1                                                                                       |
| NM_138589              | D7Wsu128e              | 2.11 | Ubiquitin family domain containing 1                                                                                         |
| ENSMUST00000049<br>869 | ENSMUST0000004<br>9869 | 2.1  | unknown                                                                                                                      |
| AK012679               | 5730470L24Rik          | 2.03 | unknown                                                                                                                      |

---

A corrected one-way analysis of variance was used to analyze the microarray data. Genes whose expression levels changed by at least 2-fold or more up-regulated genes ( $P < 0.05$ ) as compared to unstimulated cells were considered to be differentially expressed in a statistically significant manner.
