# Supplementary material
Source: PubMed Central journal article supplement (PMC3232652)
Supplement: supp_79.12.4876_IAI5451-11_ST7.pdf [file supp_79.12.4876_IAI5451-11_ST7.pdf]

**Table S7. Common genes downregulated by live *Borrelia burgdorferi* (Bb) alone or combined with IL-10 at 4 h post-stimulation**

| Gene number | Annotation    | Fold change |                 | Description/function                                                       |
|-------------|---------------|-------------|-----------------|----------------------------------------------------------------------------|
|             |               | Live Bb     | Live Bb + IL-10 |                                                                            |
|             |               |             |                 | <b>Enzyme</b>                                                              |
| AK004787    | Ndst1         | -1.04       | -1.96           | N-deacetylase/N-sulfotransferase (heparan glucosaminy) 1                   |
| AK012436    | AK012436      | -1.53       | -1.65           | adenylate cyclase 7                                                        |
| AK033485    | D230012E17Rik | -1.42       | -1.13           | post-GPI attachment to proteins 1                                          |
| NM_007398   | Ada           | -1.46       | -1.87           | adenosine deaminase                                                        |
| NM_007406   | Adcy7         | -1.2        | -1.97           | adenylate cyclase 7                                                        |
| NM_007485   | Rhod          | -1.27       | -2.29           | ras homolog gene family, member D                                          |
| NM_008567   | Mcm6          | -1.44       | -1.95           | minichromosome maintenance complex component 6                             |
| NM_009104   | Rrm2          | -1.3        | -1.64           | ribonucleotide reductase M2                                                |
| NM_009128   | Scd2          | -1.69       | -1.44           | stearoyl-Coenzyme A desaturase 2                                           |
| NM_009183   | St8sia4       | -2          | -2.72           | ST8 alpha-N-acetyl-neuraminide alpha-2,8-sialyltransferase                 |
| NM_009624   | Adcy9         | -1.71       | -1.61           | adenylate cyclase 9                                                        |
| NM_010401   | Hal           | -1.93       | -2.22           | histidine ammonia-lyase                                                    |
| NM_010631   | Kifc3         | -1.45       | -1.61           | kinesin family member C3                                                   |
| NM_011226   | Rab19         | -3.21       | -2.98           | RAB19, member RAS oncogene family                                          |
| NM_011677   | Ung           | -2.01       | -2.15           | uracil-DNA glycosylase                                                     |
| NM_013495   | Cpt1a         | -1.44       | -1.69           | carnitine palmitoyltransferase 1A (liver)                                  |
| NM_016802   | Rhoa          | -1.07       | -1.78           | ras homolog gene family, member A                                          |
| NM_018822   | Sgsh          | -1.69       | -2.34           | N-sulfoglucosamine sulfohydrolase                                          |
| NM_025331   | Gng11         | -1.15       | -1.32           | guanine nucleotide binding protein (G protein), gamma 11                   |
| NM_026557   | Rchyl         | -1.91       | -1.64           | ring finger and CHY zinc finger domain containing 1                        |
| NM_028841   | Tspan17       | -1.14       | -1.58           | tetraspanin 17                                                             |
| NM_029519   | Rap2a         | -2.86       | -3.01           | RAP2A, member of RAS oncogene family                                       |
| NM_138315   | Mical1        | -2.03       | -2.64           | microtubule associated monooxygenase, calponin and LIM domain containing 1 |
| NM_144819   | Ccdc92        | -1.5        | -1.48           | coiled-coil domain containing 92                                           |
| NM_153783   | Paox          | -1.17       | -1.34           | polyamine oxidase (exo-N4-amino)                                           |
| NM_172415   | Arhgef10l     | -1.6        | -1.65           | Rho guanine nucleotide exchange factor (GEF) 10-like                       |
| NM_172715   | A230097K15Rik | -1.27       | -2.06           | 1-acylglycerol-3-phosphate O-acyltransferase 9                             |
| NM_177305   | Arl4c         | -2.1        | -2.93           | ADP-ribosylation factor-like 4C                                            |
|             |               |             |                 | <b>G-protein coupled receptor</b>                                          |
| NM_009910   | Cxcr3         | -1.03       | -1.69           | chemokine (C-X-C motif) receptor 3                                         |
| NM_009924   | Cnr2          | -2.49       | -2.64           | cannabinoid receptor 2 (macrophage)                                        |
| NM_013533   | Gpr162        | -1.19       | -1.96           | G protein-coupled receptor 162                                             |
| NM_175116   | P2ry5         | -1.94       | -2.39           | lysophosphatidic acid receptor 6                                           |
|             |               |             |                 | <b>Growth factor</b>                                                       |
| NM_007426   | Angpt2        | -2.98       | -3.52           | angiopoietin 2                                                             |
| NM_009368   | Tgfb3         | -1.44       | -1.82           | transforming growth factor, beta 3                                         |
| NM_013598   | Kitl          | -1.11       | -1.55           | KIT ligand                                                                 |
| NM_027950   | 1700012B18Rik | -1.29       | -2.11           | oxidative stress induced growth inhibitor 1                                |

|           |               |       |       |                                                                                                |
|-----------|---------------|-------|-------|------------------------------------------------------------------------------------------------|
| NM_010598 | Kcnab2        | -1.49 | -1.24 | <b>Ion channel</b><br>potassium voltage-gated channel, shaker-related subfamily, beta member 2 |
| NM_011027 | P2rx7         | -1.78 | -2.07 | purinergic receptor P2X, ligand-gated ion channel, 7                                           |
| NM_019432 | Tmem37        | -1.54 | -2.1  | transmembrane protein 37                                                                       |
| NM_175274 | Ttyh3         | -1.29 | -1.45 | tweety homolog 3 (Drosophila)                                                                  |
|           |               |       |       | <b>Kinase</b>                                                                                  |
| AK009645  | Pdxk          | -1.19 | -2.12 | pyridoxal (pyridoxine, vitamin B6) kinase                                                      |
| NM_007377 | Aatk          | -2.06 | -1.86 | apoptosis-associated tyrosine kinase                                                           |
| NM_009371 | Tgfbr2        | -1.64 | -1.85 | transforming growth factor, beta receptor II (70/80kDa)                                        |
| NM_009582 | Map3k12       | -1.26 | -1.28 | mitogen-activated protein kinase kinase kinase 12                                              |
| NM_011496 | Aurkb         | -1.53 | -1.82 | aurora kinase B                                                                                |
| NM_130863 | Adrbk1        | -1.26 | -1.21 | adrenergic, beta, receptor kinase 1                                                            |
| NM_133810 | Stk17b        | -1.61 | -1.58 | serine/threonine kinase 17b                                                                    |
| XM_620516 | Rkhd3         | -1.64 | -3.16 | Mex-3 homolog B (C. elegans)                                                                   |
|           |               |       |       | <b>Peptidase</b>                                                                               |
| AK021184  | AK021184      | -1.18 | -1.56 | ADAM metallopeptidase domain 10                                                                |
| AK030860  | C030044C12Rik | -2.13 | -1.94 | ring finger protein 150                                                                        |
| NM_015733 | Casp9         | -1.52 | -2.04 | caspase 9, apoptosis-related cysteine peptidase                                                |
|           |               |       |       | <b>Phosphatase</b>                                                                             |
| BC058749  | Synj2         | -1.43 | -1.25 | synaptojanin 2                                                                                 |
| NM_010566 | Inpp5d        | -1.71 | -2.58 | inositol polyphosphate-5-phosphatase, 145kDa                                                   |
| NM_011204 | Ptpn13        | -1.4  | -2.28 | protein tyrosine phosphatase, non-receptor type 13 (APO-1/CD95 (Fas)-associated phosphatase)   |
| NM_011206 | Ptpn18        | -1.25 | -1.56 | protein tyrosine phosphatase, non-receptor type 18 (brain-derived)                             |
| NM_011216 | Ptpro         | -1.44 | -1.98 | protein tyrosine phosphatase, receptor type, O                                                 |
| NM_013753 | X99384        | -1.49 | -1.56 | KIAA1274                                                                                       |
| NM_023117 | Cdc25b        | -1.72 | -1.93 | cell division cycle 25 homolog B (S. pombe)                                                    |
| NM_026268 | Dusp6         | -3.18 | -3.59 | dual specificity phosphatase 6                                                                 |
| NM_146012 | Ctdsp2        | -1.69 | -1.76 | CTD (carboxy-terminal domain, RNA polymerase II, polypeptide A) small phosphatase 2            |
|           |               |       |       | <b>Transcription regulator</b>                                                                 |
| AF024519  | Tsc22d3       | -1.84 | -2.39 | TSC22 domain family, member 3                                                                  |
| AK035245  | Atf7ip        | -1.2  | -1.23 | activating transcription factor 7 interacting protein                                          |
| BC086482  | Ncoa3         | -1.03 | -1.29 | nuclear receptor coactivator 3                                                                 |
| NM_007496 | Atbf1         | -1.39 | -2.82 | zinc finger homeobox 3                                                                         |
| NM_007671 | Cdkn2c        | -1.61 | -1.27 | cyclin-dependent kinase inhibitor 2C (p18, inhibits CDK4)                                      |
| NM_008021 | Foxm1         | -1.11 | -1.7  | forkhead box M1                                                                                |
| NM_008245 | Hhex          | -2.14 | -2.74 | hematopoietically expressed homeobox                                                           |
| NM_009333 | Tcf7l2        | -1.7  | -2.63 | transcription factor 7-like 2 (T-cell specific, HMG-box)                                       |
| NM_009569 | Zfp1          | -1.5  | -2.18 | zinc finger protein, multitype 1                                                               |
| NM_010286 | Tsc22d3       | -1.63 | -1.6  | TSC22 domain family, member 3                                                                  |
| NM_010412 | Hdac5         | -1.5  | -1.35 | histone deacetylase 5                                                                          |
| NM_010495 | Id1           | -2.61 | -2.44 | inhibitor of DNA binding 1, dominant negative helix-loop-helix protein                         |
| NM_016769 | Smad3         | -1.64 | -1.27 | SMAD family member 3                                                                           |

|                               |              |       |       |                                                                                     |
|-------------------------------|--------------|-------|-------|-------------------------------------------------------------------------------------|
| NM_017405                     | Lsr          | -1.43 | -1.43 | lipolysis stimulated lipoprotein receptor                                           |
| NM_020005                     | Pcaf         | -1.23 | -1.61 | K(lysine) acetyltransferase 2B                                                      |
| NM_020331                     | Gtf2ird1     | -1.27 | -1.86 | GTF2I repeat domain containing 1                                                    |
| NM_025674                     | Tcf19        | -1.99 | -2.02 | transcription factor 19                                                             |
| NM_026756                     | Nfic         | -1.44 | -1.57 | nuclear factor I/C (CCAAT-binding transcription factor)                             |
| NM_029619                     | Msrb2        | -1.82 | -1.95 | methionine sulfoxide reductase B2                                                   |
| NM_031184                     | Glis2        | -1.37 | -1.81 | GLIS family zinc finger 2                                                           |
| NM_134250                     | Havcr2       | -1.74 | -2.57 | mediator complex subunit 7                                                          |
| NM_175494                     | Zfp367       | -1.52 | -2.06 | zinc finger protein 367                                                             |
| NM_177733                     | E2f2         | -2.42 | -2.74 | E2F transcription factor 2                                                          |
| U19596                        | Cdkn2c       | -1.4  | -1.44 | cyclin-dependent kinase inhibitor 2C (p18, inhibits CDK4)                           |
| <b>Translation regulator</b>  |              |       |       |                                                                                     |
| AK017827                      | Eif2c4       | -1.39 | -1.67 | eukaryotic translation initiation factor 2C, 4                                      |
| <b>Transmembrane receptor</b> |              |       |       |                                                                                     |
| AK088666                      | Igh-6        | -1.64 | -1.99 | immunoglobulin heavy constant mu                                                    |
| NM_009378                     | Thbd         | -2.39 | -2.56 | thrombomodulin                                                                      |
| NM_133211                     | Tlr7         | -1.29 | -1.41 | toll-like receptor 7                                                                |
| NM_133212                     | Tlr8         | -1.9  | -1.29 | toll-like receptor 8                                                                |
| XM_916118                     | Tlr5         | -1.48 | -1.62 | toll-like receptor 5                                                                |
| <b>Transporter</b>            |              |       |       |                                                                                     |
| NM_007941                     | Epim         | -1.44 | -1.66 | syntaxin 2                                                                          |
| NM_009593                     | Abcg1        | -2.89 | -3.88 | ATP-binding cassette, sub-family G (WHITE), member 1                                |
| NM_020258                     | Slc37a2      | -1.44 | -1.9  | solute carrier family 37 (glycerol-3-phosphate transporter), member 2               |
| NM_026386                     | Snx2         | -1.01 | -1.62 | sorting nexin 2                                                                     |
| NM_027521                     | Hmha1        | -2.02 | -2.07 | histocompatibility (minor) HA-1                                                     |
| NM_028123                     | Slc37a3      | -1.35 | -1.27 | solute carrier family 37 (glycerol-3-phosphate transporter), member 3               |
| NM_029097                     | Atp13a2      | -1.09 | -1.52 | ATPase type 13A2                                                                    |
| NM_029394                     | Snx24        | -1.87 | -1.51 | sorting nexin 24                                                                    |
| NM_030696                     | Slc16a3      | -1.7  | -1.77 | solute carrier family 16, member 3 (monocarboxylic acid transporter 4)              |
| NM_134154                     | AW491445     | -1.84 | -1.63 | solute carrier family 25, member 45                                                 |
| NM_145554                     | Ldlrap1      | -1.42 | -1.29 | low density lipoprotein receptor adaptor protein 1                                  |
| NM_145823                     | Pitpnc1      | -1.23 | -1.41 | phosphatidylinositol transfer protein, cytoplasmic 1                                |
| NM_172277                     | Snx8         | -1.22 | -1.22 | sorting nexin 8                                                                     |
| NM_172773                     | Slc17a5      | -1.22 | -1.28 | solute carrier family 17 (anion/sugar transporter), member 5                        |
| NM_172780                     | Slc9a6       | -1.35 | -1.36 | solute carrier family 9 (sodium/hydrogen exchanger), member 6                       |
| NM_175025                     | Atp2c1       | -1.02 | -1.43 | ATPase, Ca <sup>++</sup> transporting, type 2C, member 1                            |
| NM_178743                     | Slc26a11     | -2.62 | -3.13 | solute carrier family 26, member 11                                                 |
| <b>Other</b>                  |              |       |       |                                                                                     |
| 8430408O14                    | 8430408O14   | -2.13 | -2.04 | Unknown                                                                             |
| A_51_P183703                  | A_51_P183703 | -1.22 | -1.24 | Unknown                                                                             |
| AF020313                      | Apbb1ip      | -1.25 | -1.64 | amyloid beta (A4) precursor protein-binding, family B, member 1 interacting protein |
| AF180471/NM_015863            | Lpin1        | -1.55 | -2.08 | Unknown                                                                             |

|                      |                    |       |       |                                                   |
|----------------------|--------------------|-------|-------|---------------------------------------------------|
| AF479672             | Purg               | -1.58 | -1.68 | purine-rich element binding protein G             |
| AK007434             | 1810011H11Rik      | -1.5  | -1.48 | chromosome 10 open reading frame 128              |
| AK009333             | 2310014D11Rik      | -1.22 | -1.89 | RIKEN cDNA 2310014D11 gene                        |
| AK012399             | 2700049A03Rik      | -1.21 | -1.21 | KIAA0586                                          |
| AK030332             | 5031439G07Rik      | -1.39 | -1.38 | chromosome 22 open reading frame 9                |
| AK039250             | AK039250           | -1.28 | -1.23 | Unknown                                           |
| AK050117             | AK050117           | -1.2  | -1.59 | Unknown                                           |
| AK051905             | Cbx8               | -1.39 | -1.31 | chromobox homolog 8                               |
| AK082964             | Creb3l2            | -1.15 | -1.51 | cAMP responsive element binding protein 3-like 2  |
| AK129160             | 4732460K03Rik      | -1.63 | -2.51 | zinc finger protein 862                           |
| AK132165/NM001025577 | Maf                | -2.31 | -2    | Unknown                                           |
| AK133157             | 6430548M08Rik      | -2.13 | -2.69 | KIAA0513                                          |
| AK147212             | Zbtb4              | -1.72 | -2.09 | zinc finger and BTB domain containing 4           |
| AK147269             | Hip1               | -1.71 | -1.68 | huntingtin interacting protein 1                  |
| AK147384             | Nt5dc3             | -1.64 | -1.96 | diacylglycerol lipase, alpha                      |
| AK162197             | 1190002N15Rik      | -1.16 | -1.21 | chromosome 3 open reading frame 58                |
| AK166886             | Iqsec1             | -1.76 | -1.82 | IQ motif and Sec7 domain 1                        |
| BC028539             | H2afv              | -1.25 | -1.44 | H2A histone family, member V                      |
| BC055076             | Tns1               | -1.22 | -2.93 | tensin 1                                          |
| BC056501             | Slc45a4            | -1.14 | -1.48 | solute carrier family 45, member 4                |
| BC057094             | Trim65             | -1.69 | -1.5  | tripartite motif-containing 65                    |
| BC070477             | 2010317E24Rik      | -1.85 | -1.77 | chromosome 9 open reading frame 140               |
| BC080858             | Kbtbd11            | -2.66 | -2.84 | kelch repeat and BTB (POZ) domain containing 11   |
| BF683009             | BF683009           | -1.37 | -1.36 | Unknown                                           |
| BG961926             | Spry2              | -1.8  | -2.09 | sprouty homolog 2 (Drosophila)                    |
| ENSMUST00000003582   | ENSMUST00000003582 | -1.19 | -1.85 | Unknown                                           |
| NM_001001880         | Mpzl1              | -1.05 | -1.68 | myelin protein zero-like 1                        |
| NM_001003815         | Epb4.111           | -1.76 | -1.63 | erythrocyte membrane protein band 4.1-like 1      |
| NM_001005421         | Amica1             | -1.21 | -1.58 | adhesion molecule, interacts with CXADR antigen 1 |
| NM_001013368         | E2f8               | -1.71 | -2.66 | E2F transcription factor 8                        |
| NM_001013370         | Sesn1              | -1.7  | -1.47 | sestrin 1                                         |
| NM_001039472         | Kif21b             | -1.38 | -2.05 | kinesin family member 21B                         |
| NM_007408            | Adfp               | -1.33 | -1.48 | perilipin 2                                       |
| NM_007631            | Cend1              | -3.21 | -3.87 | cyclin D1                                         |
| NM_007681            | Cenpa              | -1.55 | -2.1  | centromere protein A                              |
| NM_007796            | Ctla2a             | -1.68 | -1.89 | cytotoxic T lymphocyte-associated protein 2 alpha |
| NM_007965            | Evl                | -1.36 | -2.01 | Enah/Vasp-like                                    |
| NM_008511            | Lrmp               | -1.25 | -1.27 | lymphoid-restricted membrane protein              |
| NM_008535            | Lyl1               | -1.83 | -2.04 | lymphoblastic leukemia derived sequence 1         |
| NM_009025            | Rasa3              | -2.36 | -2.74 | RAS p21 protein activator 3                       |
| NM_009061            | Rgs2               | -1.37 | -2.06 | regulator of G-protein signaling 2, 24kDa         |
| NM_009741            | Bcl2               | -1.13 | -2.24 | B-cell CLL/lymphoma 2                             |
| NM_010071            | Dok2               | -1.19 | -1.98 | docking protein 2, 56kDa                          |
| NM_011020            | Hspa4l             | -1.45 | -1.85 | heat shock 70kDa protein 4-like                   |

|           |               |       |       |                                                                                              |
|-----------|---------------|-------|-------|----------------------------------------------------------------------------------------------|
| NM_011415 | Snai2         | -1.75 | -2.34 | snail homolog 2 (Drosophila)                                                                 |
| NM_011653 | Tuba1         | -1.25 | -1.87 | tubulin, alpha 1a                                                                            |
| NM_011764 | Zfp90         | -1.37 | -1.35 | zinc finger protein 90 homolog (mouse)                                                       |
| NM_011799 | Cdc6          | -1.94 | -1.99 | cell division cycle 6 homolog (S. cerevisiae)                                                |
| NM_013710 | Fgd2          | -1.17 | -1.91 | FYVE, RhoGEF and PH domain containing 2                                                      |
| NM_013843 | Zfp53         | -1.21 | -1.32 | zinc finger protein 53                                                                       |
| NM_016757 | Wbp1          | -1.03 | -1.52 | WW domain binding protein 1                                                                  |
| NM_016925 | Fanca         | -1.05 | -1.64 | Fanconi anemia, complementation group A                                                      |
| NM_018769 | Dfna5h        | -2.44 | -3.65 | deafness, autosomal dominant 5                                                               |
| NM_019831 | Zmym3         | -1.66 | -1.32 | zinc finger, MYM-type 3                                                                      |
| NM_020567 | Gmnn          | -1.43 | -1.74 | geminin, DNA replication inhibitor                                                           |
| NM_021406 | Trem1         | -1.38 | -1.57 | triggering receptor expressed on myeloid cells 1                                             |
| NM_021424 | Pvr1l         | -1.09 | -2.48 | poliovirus receptor-related 1 (herpesvirus entry mediator C)                                 |
| NM_023719 | Txnip         | -1.91 | -1.75 | thioredoxin interacting protein                                                              |
| NM_024184 | Asf1b         | -1.29 | -1.32 | ASF1 anti-silencing function 1 homolog B (S. cerevisiae)                                     |
| NM_024223 | Crip2         | -1.47 | -2.27 | cysteine-rich protein 2                                                                      |
| NM_025294 | Gtlf3b        | -1.17 | -1.72 | chromosome 17 open reading frame 103                                                         |
| NM_025491 | Susd3         | -1.86 | -2.15 | sushi domain containing 3                                                                    |
| NM_025659 | Abi3          | -1.75 | -1.68 | ABI family, member 3                                                                         |
| NM_026014 | Cdt1          | -1.55 | -2.14 | chromatin licensing and DNA replication factor 1                                             |
| NM_026169 | l200004M23Rik | -1.31 | -1.8  | FERM domain containing 8                                                                     |
| NM_026178 | Mmd           | -1.33 | -3.18 | monocyte to macrophage differentiation-associated                                            |
| NM_026436 | Tmem86a       | -1.97 | -2.36 | transmembrane protein 86A                                                                    |
| NM_026555 | Rcn3          | -1.69 | -1.44 | reticulocalbin 3, EF-hand calcium binding domain                                             |
| NM_026599 | Cgnl1         | -1.31 | -2.16 | cingulin-like 1                                                                              |
| NM_026712 | Zfp414        | -1.24 | -1.82 | zinc finger protein 414                                                                      |
| NM_027881 | Osbpl3        | -2.12 | -2    | oxysterol binding protein-like 3                                                             |
| NM_027987 | Cd300lg       | -1.77 | -1.36 | CD300 molecule-like family member g                                                          |
| NM_027995 | Paqr7         | -1.72 | -1.47 | progesterin and adipoQ receptor family member VII                                            |
| NM_028055 | l500005I02Rik | -2.18 | -2.27 | BTB (POZ) domain containing 17                                                               |
| NM_028724 | Rin2          | -1.52 | -1.29 | Ras and Rab interactor 2                                                                     |
| NM_028760 | Cep55         | -1.03 | -1.15 | centrosomal protein 55kDa                                                                    |
| NM_028833 | Iqce          | -1.29 | -1.63 | IQ motif containing E                                                                        |
| NM_029091 | Klc4          | -1.58 | -1.61 | kinesin light chain 4                                                                        |
| NM_029612 | Slamf9        | -1.03 | -1.29 | SLAM family member 9                                                                         |
| NM_029766 | Dtl           | -1.49 | -1.65 | denticleless homolog (Drosophila)                                                            |
| NM_030244 | Ier5l         | -1.5  | -1.26 | immediate early response 5-like                                                              |
| NM_031257 | Plekha2       | -1.6  | -1.66 | pleckstrin homology domain containing, family A (phosphoinositide binding specific) member 2 |
| NM_052976 | Ophn1         | -1.35 | -1.53 | oligophrenin 1                                                                               |
| NM_053214 | Myo1f         | -1.39 | -1.45 | myosin IF                                                                                    |
| NM_133236 | Glcc1         | -1.31 | -1.32 | glucocorticoid induced transcript 1                                                          |
| NM_133910 | Tbc1d14       | -1.41 | -1.68 | TBC1 domain family, member 14                                                                |
| NM_134046 | Cenpo         | -1.29 | -1.49 | centromere protein O                                                                         |
| NM_134083 | Rcbbt2        | -1.31 | -1.4  | regulator of chromosome condensation (RCC1) and BTB (POZ) domain containing protein 2        |

|              |               |       |       |                                                                                         |
|--------------|---------------|-------|-------|-----------------------------------------------------------------------------------------|
| NM_139200    | Pscdbp        | -1.61 | -2.43 | cytohesin 1 interacting protein                                                         |
| NM_145220    | Dip3b         | -1.99 | -1.45 | adaptor protein, phosphotyrosine interaction, PH domain and leucine zipper containing 2 |
| NM_145588    | Kif22         | -1.26 | -1.36 | kinesin family member 22                                                                |
| NM_145974    | C330016O10Rik | -2.18 | -3.54 | Nedd4 binding protein 3                                                                 |
| NM_146033    | Ankmy2        | -1.68 | -1.91 | ankyrin repeat and MYND domain containing 2                                             |
| NM_148922    | Mdm1          | -1.64 | -1.94 | Mdm1 nuclear protein homolog (mouse)                                                    |
| NM_152801    | Arhgef6       | -1.48 | -1.73 | Rac/Cdc42 guanine nucleotide exchange factor (GEF) 6                                    |
| NM_153138    | Waspip        | -1.85 | -2.22 | WAS/WASL interacting protein family, member 1                                           |
| NM_153782    | BC029169      | -1.32 | -1.76 | family with sequence similarity 20, member A                                            |
| NM_153804    | Plekhg3       | -2.27 | -2.73 | pleckstrin homology domain containing, family G (with RhoGef domain) member 3           |
| NM_172051    | Tmcc3         | -2.13 | -2.55 | transmembrane and coiled-coil domain family 3                                           |
| NM_172122    | Crocc         | -1.17 | -2.2  | ciliary rootlet coiled-coil, rootletin                                                  |
| NM_172286    | 6430548M08Rik | -2.17 | -2.61 | KIAA0513                                                                                |
| NM_172500    | 4831426I19Rik | -1.22 | -1.46 | chromosome 14 open reading frame 49                                                     |
| NM_172570    | Trim47        | -1.85 | -2.19 | tripartite motif-containing 47                                                          |
| NM_172685    | Slc25a24      | -1.57 | -2.22 | solute carrier family 25 (mitochondrial carrier; phosphate carrier), member 24          |
| NM_175433    | Zfp710        | -1.57 | -2.11 | zinc finger protein 710                                                                 |
| NM_175476    | Arhgap25      | -2.51 | -3.01 | Rho GTPase activating protein 25                                                        |
| NM_176995    | C230078M08Rik | -1.58 | -2.1  | neuralized homolog 1B (Drosophila)                                                      |
| NM_177089    | Tacc1         | -1.28 | -1.8  | transforming, acidic coiled-coil containing protein 1                                   |
| NM_177231    | Arrb1         | -1.49 | -1.97 | arrestin, beta 1                                                                        |
| NM_177260    | Tmem154       | -2.09 | -2.84 | transmembrane protein 154                                                               |
| NM_177372    | Dna21         | -1.65 | -1.4  | DNA replication helicase 2 homolog (yeast)                                              |
| NM_178421    | Nanos1        | -1.48 | -2.25 | nanos homolog 1 (Drosophila)                                                            |
| NM_178593    | Resd1         | -1.57 | -2.01 | RCSD domain containing 1                                                                |
| NM_178683    | Depdc1b       | -1.68 | -1.87 | DEP domain containing 1B                                                                |
| NM_178917    | Arrdc3        | -1.8  | -2    | Unknown                                                                                 |
| NM_197986    | 1110007F12Rik | -2.37 | -2.5  | transmembrane protein 140                                                               |
| NM_197990    | 1700025G04Rik | -1.09 | -1.4  | chromosome 1 open reading frame 21                                                      |
| NM_198301    | BC052328      | -1.83 | -1.62 | family with sequence similarity 105, member A                                           |
| NM_198671    | Gse1          | -1.55 | -2.33 | KIAA0182                                                                                |
| NM_199018    | Stard8        | -1.73 | -1.59 | StAR-related lipid transfer (START) domain containing 8                                 |
| NM_207246    | Rasgrp3       | -1.7  | -1.56 | RAS guanyl releasing protein 3 (calcium and DAG-regulated)                              |
| TC1516668    | TC1516668     | -2.77 | -3.11 | Unknown                                                                                 |
| TC1537769    | TC1537769     | -1.99 | -2.15 | Unknown                                                                                 |
| XM_001005196 | LOC668856     | -1.75 | -2.32 | Unknown                                                                                 |
| XM_899897    | Cenpf         | -1.19 | -1.37 | centromere protein F, 350/400kDa (mitosin)                                              |
| XM_986527    | Gna12         | -1.24 | -1.4  | Unknown                                                                                 |
| XM_990990    | LOC676546     | -1.58 | -3.18 | similar to monocyte to macrophage differentiation-associated                            |

A corrected one-way analysis of variance was used to analyze the microarray data. Genes whose expression levels changed by at least 2-fold or more up-regulated genes ( $P < 0.05$ ) as compared to unstimulated cells were considered to be differentially expressed in a statistically significant manner.
