# Supplementary material
Source: PubMed Central journal article supplement (PMC3232652)
Supplement: supp_79.12.4876_IAI5451-11_ST8.pdf [file supp_79.12.4876_IAI5451-11_ST8.pdf]

**Table S8. Common genes downregulated by live *Borrelia burgdorferi* (Bb) alone or combined with IL-10 at 24 h post-stimulation**

| Gene number | Annotation             | Fold Change |                 | Description/function<br>Enzyme                                                        |
|-------------|------------------------|-------------|-----------------|---------------------------------------------------------------------------------------|
|             |                        | Live Bb     | Live Bb + IL-10 |                                                                                       |
| AK160524    | PDPR                   | -1.38       | -2.03           | pyruvate dehydrogenase phosphatase regulatory subunit                                 |
| NM_009662   | ALOX5                  | -2.9        | -1.98           | arachidonate 5-lipoxygenase                                                           |
| NM_177305   | ARL4C                  | -2.18       | -2.06           | ADP-ribosylation factor-like 4C                                                       |
| NM_007550   | BLM                    | -1.7        | -1.38           | Bloom syndrome, RecQ helicase-like                                                    |
| NM_178309   | BRIP1                  | -1.6        | -1.23           | BRCA1 interacting protein C-terminal helicase 1                                       |
| NM_016803   | CHST3                  | -1.69       | -2.13           | carbohydrate (chondroitin 6) sulfotransferase 3                                       |
| NM_013495   | CPT1A                  | -1.6        | -1.38           | carnitine palmitoyltransferase 1A (liver)                                             |
| NM_010049   | DHFR                   | -1.72       | -1.17           | dihydrofolate reductase                                                               |
| NM_023595   | DUT (includes EG:1854) | -2.18       | -1.66           | deoxyuridine triphosphatase                                                           |
| NM_028013   | ENDOD1                 | -1.89       | -1.19           | endonuclease domain containing 1                                                      |
| NM_012012   | EXO1                   | -2.45       | -2.39           | exonuclease 1                                                                         |
| NM_025995   | FBXO5                  | -1.96       | -2.11           | F-box protein 5                                                                       |
| NM_021891   | FIGNL1                 | -2.51       | -1.94           | fidgetin-like 1                                                                       |
| NM_010401   | HAL                    | -1.71       | -2.25           | histidine ammonia-lyase                                                               |
| NM_008234   | HELLS                  | -1.24       | -1.2            | helicase, lymphoid-specific                                                           |
| NM_133815   | LBR                    | -1.99       | -1.47           | lamin B receptor                                                                      |
| NM_010715   | LIG1                   | -2.02       | -1.35           | ligase I, DNA, ATP-dependent                                                          |
| NM_010764   | MAN2B1                 | -1.8        | -1.39           | mannosidase, alpha, class 2B, member 1                                                |
| NM_008563   | MCM3                   | -1.86       | -1.37           | minichromosome maintenance complex component 3                                        |
| NM_008567   | MCM6                   | -2.35       | -1.54           | minichromosome maintenance complex component 6                                        |
| NM_008568   | MCM7                   | -2.42       | -1.48           | minichromosome maintenance complex component 7                                        |
| AK008211    | MGST3                  | -1.57       | -1.49           | microsomal glutathione S-transferase 3                                                |
| NM_138315   | MICAL1                 | -1.86       | -1.09           | microtubule associated monooxygenase, calponin and LIM domain containing 1            |
| XM_193936   | KIF20B                 | -1.48       | -2.73           | kinesin family member 20B                                                             |
| NM_146208   | NEIL3                  | -2.54       | -2.05           | nei endonuclease VIII-like 3 (E. coli)                                                |
| NM_011131   | POLD1                  | -1.79       | -1.19           | polymerase (DNA directed), delta 1, catalytic subunit 125kDa                          |
| NM_011132   | POLE                   | -2.33       | -1.85           | polymerase (DNA directed), epsilon                                                    |
| XM_979374   | PPIL5                  | -2.41       | -1.96           | peptidylprolyl isomerase (cyclophilin)-like 5                                         |
| NM_008969   | PTGS1                  | -2.38       | -1.55           | prostaglandin-endoperoxide synthase 1 (prostaglandin G/H synthase and cyclooxygenase) |
| NM_011226   | RAB19                  | -1.97       | -1.27           | RAB19, member RAS oncogene family                                                     |
| NM_011234   | RAD51                  | -2.76       | -2.14           | RAD51 homolog (RecA homolog, E. coli) (S. cerevisiae)                                 |
| BC089001    | RFC5                   | -1.97       | -1.22           | replication factor C (activator 1) 5, 36.5kDa                                         |
| NM_023275   | RHOJ                   | -1.44       | -1.42           | ras homolog gene family, member J                                                     |
| NM_021472   | RNASE4                 | -1.78       | -1.34           | ribonuclease, RNase A family, 4                                                       |
| NM_009104   | RRM2                   | -3.42       | -2.13           | ribonucleotide reductase M2                                                           |
| NM_018822   | SGSH                   | -1.67       | -1.09           | N-sulfoglucosamine sulfohydrolase                                                     |
| NM_009183   | ST8SIA4                | -3.2        | -2.09           | ST8 alpha-N-acetyl-neuraminide alpha-2,8-sialyltransferase 4                          |

|                                   |        |       |       |                                                               |
|-----------------------------------|--------|-------|-------|---------------------------------------------------------------|
| NM_009405                         | TNNI2  | -1.48 | -1.19 | troponin I type 2 (skeletal, fast)                            |
| NM_011623                         | TOP2A  | -2.06 | -1.59 | topoisomerase (DNA) II alpha 170kDa                           |
| NM_021288                         | TYMS   | -1.1  | -1.65 | thymidylate synthetase                                        |
| NM_026785                         | UBE2C  | -2.5  | -2.54 | ubiquitin-conjugating enzyme E2C                              |
| NM_026024                         | UBE2T  | -2.97 | -2.36 | ubiquitin-conjugating enzyme E2T (putative)                   |
| BC066035                          | ZRANB3 | -1.34 | -1.07 | zinc finger, RAN-binding domain containing 3                  |
| <b>G-protein coupled receptor</b> |        |       |       |                                                               |
| NM_009910                         | CXCR3  | -2.1  | -1.61 | chemokine (C-X-C motif) receptor 3                            |
| NM_009911                         | CXCR4  | -1.82 | -1.59 | chemokine (C-X-C motif) receptor 4                            |
| NM_007901                         | S1PR1  | -1.53 | -1.36 | sphingosine-1-phosphate receptor 1                            |
| <b>Growth factor</b>              |        |       |       |                                                               |
| NM_027950                         | OSGIN1 | -1.34 | -1.17 | oxidative stress induced growth inhibitor 1                   |
| NM_019521                         | GAS6   | -2.46 | -2.06 | growth arrest-specific 6                                      |
| NM_013598                         | KITLG  | -2.16 | -2.71 | KIT ligand                                                    |
| NM_009368                         | TGFB3  | -1.11 | -1.26 | transforming growth factor, beta 3                            |
| <b>Kinase</b>                     |        |       |       |                                                               |
| NM_011497                         | AURKA  | -2.09 | -1.77 | aurora kinase A                                               |
| NM_011496                         | AURKB  | -2.84 | -2.18 | aurora kinase B                                               |
| NM_009772                         | BUB1   | -2.2  | -1.95 | budding uninhibited by benzimidazoles 1 homolog (yeast)       |
| NM_009773                         | BUB1B  | -1.48 | -1.22 | budding uninhibited by benzimidazoles 1 homolog beta (yeast)  |
| NM_007659                         | CDK1   | -1.7  | -1.73 | cyclin-dependent kinase 1                                     |
| NM_016904                         | CKS1B  | -1.75 | -1.52 | CDC28 protein kinase regulatory subunit 1B                    |
| NM_025415                         | CKS2   | -1.99 | -1.83 | CDC28 protein kinase regulatory subunit 2                     |
| NM_010353                         | GSG2   | -2.11 | -2.13 | germ cell associated 2 (haspin)                               |
| NM_025979                         | MASTL  | -1.22 | -2.19 | microtubule associated serine/threonine kinase-like           |
| NM_010790                         | MELK   | -2.46 | -2.09 | maternal embryonic leucine zipper kinase                      |
| NM_010892                         | NEK2   | -2.39 | -2.56 | NIMA (never in mitosis gene a)-related kinase 2               |
| AK037833                          | NUCKS1 | -1.18 | -1.13 | nuclear casein kinase and cyclin-dependent kinase substrate 1 |
| NM_080850                         | PASK   | -1.9  | -1.86 | PAS domain containing serine/threonine kinase                 |
| NM_023209                         | PBK    | -3.31 | -2.91 | PDZ binding kinase                                            |
| NM_011121                         | PLK1   | -2.75 | -2.58 | polo-like kinase 1                                            |
| XM_620516                         | MEX3B  | -2.45 | -2.41 | mex-3 homolog B (C. elegans)                                  |
| NM_009387                         | TK1    | -2.25 | -1.19 | thymidine kinase 1, soluble                                   |
| <b>Peptidase</b>                  |        |       |       |                                                               |
| AK030860                          | RNF150 | -1.82 | -1.38 | ring finger protein 150                                       |
| NM_007610                         | CASP2  | -1.32 | -1.07 | caspase 2, apoptosis-related cysteine peptidase               |
| NM_176913                         | DPEP2  | -1.19 | -1.42 | dipeptidase 2                                                 |
| NM_007930                         | ENC1   | -1.63 | -1.59 | ectodermal-neural cortex 1 (with BTB-like domain)             |
| NM_001014976                      | ESPL1  | -1.16 | -1.12 | extra spindle pole bodies homolog 1 (S. cerevisiae)           |
| NM_008873                         | PLAU   | -2.02 | -1.65 | plasminogen activator, urokinase                              |
| NM_017407                         | SPAG5  | -2.1  | -2.23 | sperm associated antigen 5                                    |
| NM_029012                         | SPPL3  | -1.08 | -2.19 | signal peptide peptidase 3                                    |
| NM_146144                         | USP1   | -1.11 | -1.17 | ubiquitin specific peptidase 1                                |

|                                |         |       |       |                                                                                     |
|--------------------------------|---------|-------|-------|-------------------------------------------------------------------------------------|
| NM_023117                      | CDC25B  | -1.77 | -1.68 | <b>Phosphatase</b><br>cell division cycle 25 homolog B (S. pombe)                   |
| BC049694                       | CDKN3   | -2.43 | -2.13 | cyclin-dependent kinase inhibitor 3                                                 |
| NM_026268                      | DUSP6   | -2.31 | -1.86 | dual specificity phosphatase 6                                                      |
| NM_011216                      | PTPRO   | -1.5  | -1.23 | protein tyrosine phosphatase, receptor type, O                                      |
| <b>Transcription regulator</b> |         |       |       |                                                                                     |
| NM_007496                      | ZFH3    | -1.28 | -1.77 | zinc finger homeobox 3                                                              |
| NM_009764                      | BRCA1   | -1.78 | -1.59 | breast cancer 1, early onset                                                        |
| NM_007891                      | E2F1    | -1.49 | -1.15 | E2F transcription factor 1                                                          |
| NM_177733                      | E2F2    | -2.3  | -1.65 | E2F transcription factor 2                                                          |
| NM_178609                      | E2F7    | -1.6  | -1.59 | E2F transcription factor 7                                                          |
| NM_007971                      | EZH2    | -2.04 | -1.44 | enhancer of zeste homolog 2 (Drosophila)                                            |
| NM_008021                      | FOXM1   | -2.78 | -1.93 | forkhead box M1                                                                     |
| NM_134250                      | MED7    | -1.4  | -1.6  | mediator complex subunit 7                                                          |
| NM_008252                      | HMGB2   | -2.19 | -2.04 | high-mobility group box 2                                                           |
| AK138228                       | HMX2    | -1.03 | -1.89 | H6 family homeobox 2                                                                |
| XM_284454                      | IRF2BP2 | -1.42 | -1.72 | interferon regulatory factor 2 binding protein 2                                    |
| NM_017405                      | LSR     | -2.04 | -1.34 | lipolysis stimulated lipoprotein receptor                                           |
| NM_008652                      | MYBL2   | -2.12 | -1.72 | v-myb myeloblastosis viral oncogene homolog (avian)-like 2                          |
| NM_183091                      | NFKBIL2 | -1.58 | -1.28 | nuclear factor of kappa light polypeptide gene enhancer in B-cells inhibitor-like 2 |
| NM_013917                      | PTTG1   | -1.11 | -1.26 | pituitary tumor-transforming 1                                                      |
| NM_025674                      | TCF19   | -2.2  | -1.34 | transcription factor 19                                                             |
| S79780                         | TFDP2   | -2.06 | -1.6  | transcription factor Dp-2 (E2F dimerization partner 2)                              |
| NM_019551                      | TDP2    | -1.24 | -1.25 | tyrosyl-DNA phosphodiesterase 2                                                     |
| NM_010931                      | UHRF1   | -2.41 | -1.74 | ubiquitin-like with PHD and ring finger domains 1                                   |
| NM_175494                      | ZNF367  | -2.51 | -2.55 | zinc finger protein 367                                                             |
| <b>Translation regulator</b>   |         |       |       |                                                                                     |
| AK017827                       | EIF2C4  | -1.44 | -1.36 | eukaryotic translation initiation factor 2C, 4                                      |
| <b>Transmembrane receptor</b>  |         |       |       |                                                                                     |
| NM_007650                      | CD5     | -1.37 | -1.22 | CD5 molecule                                                                        |
| NM_020008                      | CLEC7A  | -2.9  | -2.16 | C-type lectin domain family 7, member A                                             |
| AK088666                       | IGHM    | -2.33 | -1.86 | immunoglobulin heavy constant mu                                                    |
| NM_001025602                   | IL1RL1  | -1.98 | -1.76 | interleukin 1 receptor-like 1                                                       |
| NM_031254                      | TREM2   | -1.44 | -1.41 | triggering receptor expressed on myeloid cells 2                                    |
| <b>Transporter</b>             |         |       |       |                                                                                     |
| NM_020332                      | ANKH    | -1.44 | -1.36 | ankylosis, progressive homolog (mouse)                                              |
| AK045558                       | AP1S2   | -3    | -1.85 | adaptor-related protein complex 1, sigma 2 subunit                                  |
| NM_008035                      | FOLR2   | -1.56 | -1.8  | folate receptor 2 (fetal)                                                           |
| NM_009004                      | KIF20A  | -2.57 | -2.54 | kinesin family member 20A                                                           |
| NM_010655                      | KPNA2   | -1.06 | -1.12 | karyopherin alpha 2 (RAG cohort 1, importin alpha 1)                                |
| NM_012025                      | RACGAP1 | -2.97 | -2.18 | Rac GTPase activating protein 1                                                     |
| NM_012032                      | SERINC3 | -1.11 | -1.3  | serine incorporator 3                                                               |
| NM_016917                      | SLC40A1 | -1.84 | -2.09 | solute carrier family 40 (iron-regulated transporter), member 1                     |

|                    |               |       |       |                                                                            |
|--------------------|---------------|-------|-------|----------------------------------------------------------------------------|
| NM_008017          | SMC2          | -1.91 | -1.96 | structural maintenance of chromosomes 2                                    |
| NM_133786          | SMC4          | -1.61 | -1.68 | structural maintenance of chromosomes 4                                    |
| NM_133977          | TF            | -1.52 | -1.39 | transferrin                                                                |
| <b>Other</b>       |               |       |       |                                                                            |
| NM_025411          | C1ORF128      | -1.34 | -1.23 | chromosome 1 open reading frame 128                                        |
| AK138072           | 1190002F15RIK | -1.93 | -1.95 | RIKEN cDNA 1190002F15 gene                                                 |
| AK162197           | C3ORF58       | -1.55 | -1.11 | chromosome 3 open reading frame 58                                         |
| BC036300           | C1ORF96       | -2.08 | -2.2  | chromosome 1 open reading frame 96                                         |
| AK003102           | C8ORF4        | -1.48 | -1.44 | chromosome 8 open reading frame 4                                          |
| NM_026931          | C8ORF4        | -2.25 | -2.04 | chromosome 8 open reading frame 4                                          |
| BC070477           | C9ORF140      | -4.19 | -3.69 | chromosome 9 open reading frame 140                                        |
| BC046968/XM_149712 | 2210010N04Rik | -1.21 | -1.55 | Unknown                                                                    |
| XM_133876          | NSMCE4A       | -1.56 | -1.12 | non-SMC element 4 homolog A ( <i>S. cerevisiae</i> )                       |
| NM_183089          | DSCC1         | -2.97 | -2.62 | defective in sister chromatid cohesion 1 homolog ( <i>S. cerevisiae</i> )  |
| XM_131720          | C1ORF135      | -2.45 | -2.02 | chromosome 1 open reading frame 135                                        |
| NM_028131          | CENPN         | -1.9  | -1.49 | centromere protein N                                                       |
| NM_146171          | NCAPD2        | -2.51 | -2.17 | non-SMC condensin I complex, subunit D2                                    |
| NM_026515          | KIAA0101      | -3.03 | -2.39 | KIAA0101                                                                   |
| NM_025581          | SKA1          | -2.86 | -2.32 | spindle and kinetochore associated complex subunit 1                       |
| AK013380           | NCAPD2        | -1.77 | -1.8  | non-SMC condensin I complex, subunit D2                                    |
| NM_197959          | KIF18B        | -2.69 | -2.23 | kinesin family member 18B                                                  |
| NM_198654          | NSL1          | -3.25 | -2.84 | NSL1, MIND kinetochore complex component, homolog ( <i>S. cerevisiae</i> ) |
| BC003498           | PSD3          | -1.71 | -1.45 | pleckstrin and Sec7 domain containing 3                                    |
| XM_974899          | 5730405I09Rik | -1.59 | -1.34 | Unknown                                                                    |
| AJ237585           | NCAPG         | -2.66 | -2.13 | non-SMC condensin I complex, subunit G                                     |
| NM_198652          | HJURP         | -1.14 | -1.18 | Holliday junction recognition protein                                      |
| NM_144526          | FAM64A        | -2.57 | -3.11 | family with sequence similarity 64, member A                               |
| NM_183224          | FAM19A3       | -1.73 | -2.72 | family with sequence similarity 19 (chemokine (C-C motif)-like), member A3 |
| NM_145980          | C10ORF10      | -1.8  | -3.96 | chromosome 10 open reading frame 10                                        |
| NM_009643          | AHNAK         | -1.2  | -1.13 | AHNAK nucleoprotein                                                        |
| NM_172714          | LIN54         | -1.3  | -1.36 | lin-54 homolog ( <i>C. elegans</i> )                                       |
| AK198605           | AK198605      | -1.58 | -1.45 | Unknown                                                                    |
| NM_001039562       | ANKRD37       | -2.05 | -1.37 | ankyrin repeat domain 37                                                   |
| AK083552           | ANKLE1        | -1.64 | -1.7  | ankyrin repeat and LEM domain containing 1                                 |
| NM_181416          | ARHGAP11A     | -1.28 | -1.67 | Rho GTPase activating protein 11A                                          |
| NM_009707          | ARHGAP6       | -1.69 | -1.7  | Rho GTPase activating protein 6                                            |
| NM_024184          | ASF1B         | -2.39 | -2    | ASF1 anti-silencing function 1 homolog B ( <i>S. cerevisiae</i> )          |
| NM_027435          | ATAD2         | -2.22 | -1.57 | ATPase family, AAA domain containing 2                                     |
| NM_178113          | NCAPD3        | -1.92 | -1.46 | non-SMC condensin II complex, subunit D3                                   |
| XM_283903          | FAM102B       | -1.64 | -1.27 | family with sequence similarity 102, member B                              |
| BC013561           | BC013561      | -1.29 | -1.14 | Unknown                                                                    |
| NM_145946          | FANCI         | -1.98 | -1.72 | Fanconi anemia, complementation group I                                    |
| NM_009689          | BIRC5         | -3.05 | -2.74 | baculoviral IAP repeat-containing 5                                        |

|                      |                              |       |       |                                                                              |
|----------------------|------------------------------|-------|-------|------------------------------------------------------------------------------|
| NM_144818            | NCAPH                        | -1.46 | -1.89 | non-SMC condensin I complex, subunit H                                       |
| BU554808             | BU554808                     | -2.64 | -2.11 | Unknown                                                                      |
| NM_001039579         |                              | -1.53 | -1.37 | Unknown                                                                      |
| NM_001029856         | ATAD5                        | -2.21 | -2.05 | ATPase family, AAA domain containing 5                                       |
| NM_176995            | NEURL1B                      | -2.29 | -1.94 | neuralized homolog 1B (Drosophila)                                           |
| NM_145974            | N4BP3                        | -3.66 | -2.2  | Nedd4 binding protein 3                                                      |
| NM_172578            | C14ORF106                    | -1.53 | -2.08 | chromosome 14 open reading frame 106                                         |
| XM_001000807         | CBX5                         | -1.69 | -1.2  | chromobox homolog 5                                                          |
| NM_009828            | CCNA2                        | -3.4  | -3    | cyclin A2                                                                    |
| NM_172301            | CCNB1                        | -2.4  | -2.71 | cyclin B1                                                                    |
| NM_007630            | CCNB2                        | -2.51 | -2.87 | cyclin B2                                                                    |
| NM_007631            | CCND1                        | -2.94 | -2.22 | cyclin D1                                                                    |
| NM_007634            | CCNF                         | -2.06 | -2.46 | cyclin F                                                                     |
| NM_007642            | CD28                         | -1.37 | -1.63 | CD28 molecule                                                                |
| NM_027987            | CD300LG                      | -2.87 | -1.57 | CD300 molecule-like family member g                                          |
| NM_009856            | CD83                         | -1.18 | -2.04 | CD83 molecule                                                                |
| NM_023223            | CDC20                        | -2.05 | -2.1  | cell division cycle 20 homolog (S. cerevisiae)                               |
| NM_011799            | CDC6                         | -2.59 | -2    | cell division cycle 6 homolog (S. cerevisiae)                                |
| NM_023284            | NUF2                         | -3.2  | -2.94 | NUF2, NDC80 kinetochore complex component, homolog (S. cerevisiae)           |
| NM_175384            | CDCA2                        | -2.39 | -1.84 | cell division cycle associated 2                                             |
| NM_013538            | CDCA3                        | -1.92 | -1.61 | cell division cycle associated 3                                             |
| NM_026410            | CDCA5                        | -2.02 | -1.59 | cell division cycle associated 5                                             |
| NM_025866            | CDCA7                        | -1.39 | -1.54 | cell division cycle associated 7                                             |
| NM_026560            | CDCA8                        | -1.74 | -1.53 | cell division cycle associated 8                                             |
| NM_007671/U195<br>96 | Cdkn2c                       | -2.29 | -1.7  | Unknown                                                                      |
| NM_007681            | CENPA                        | -1.85 | -2.09 | centromere protein A                                                         |
| BC059032             | CENPE                        | -2.5  | -2.37 | centromere protein E, 312kDa                                                 |
| XM_899897            | CENPF                        | -2.99 | -2.87 | centromere protein F, 350/400kDa (mitosin)                                   |
| NM_021886            | CENPH (includes<br>EG:64946) | -1.52 | -1.57 | centromere protein H                                                         |
| NM_021790            | CENPK                        | -1.84 | -1.91 | centromere protein K                                                         |
| NM_027429            | CENPL                        | -1.37 | -1.35 | centromere protein L                                                         |
| NM_031863            | CENPQ                        | -2.04 | -2.09 | centromere protein Q                                                         |
| NM_028760            | CEP55                        | -3.05 | -2.27 | centrosomal protein 55kDa                                                    |
| NM_145409            | CTHF18                       | -1.68 | -1.36 | CTF18, chromosome transmission fidelity factor 18<br>homolog (S. cerevisiae) |
| NM_001004140         | CKAP2                        | -1.2  | -1.86 | cytoskeleton associated protein 2                                            |
| NM_007791            | CSRP1                        | -1.61 | -1.18 | cysteine and glycine-rich protein 1                                          |
| NM_025795            | NCAPH2                       | -1.24 | -1.34 | non-SMC condensin II complex, subunit H2                                     |
| NM_033075            | D17H6S56E-5                  | -2.11 | -1.83 | DNA segment, Chr 17, human D6S56E 5                                          |
| NM_026412            | C15ORF23                     | -1.62 | -2.22 | chromosome 15 open reading frame 23                                          |
| NM_153574            | FAM13A                       | -1.48 | -1.67 | family with sequence similarity 13, member A                                 |
| NM_134147            | MACROD1                      | -1.68 | -1.92 | MACRO domain containing 1                                                    |
| NM_029523            | DEPDC1                       | -1.67 | -2.03 | DEP domain containing 1                                                      |
| NM_178683            | DEPDC1B                      | -3.07 | -3.29 | DEP domain containing 1B                                                     |

|                    |                              |       |       |                                                             |
|--------------------|------------------------------|-------|-------|-------------------------------------------------------------|
| NM_018769          | DFNA5                        | -1.1  | -1.02 | deafness, autosomal dominant 5                              |
| NM_134081          | DNAJC9                       | -2.11 | -1.6  | DnaJ (Hsp40) homolog, subfamily C, member 9                 |
| NM_029766          | DTL                          | -3.14 | -2.01 | denticleless homolog (Drosophila)                           |
| NM_198249          | ARHGEF40                     | -1.74 | -1.47 | Rho guanine nucleotide exchange factor (GEF) 40             |
| NM_001013377       | C9ORF100                     | -2.18 | -2.65 | chromosome 9 open reading frame 100                         |
| NM_001013368       | E2F8                         | -3.24 | -3.62 | E2F transcription factor 8                                  |
| NM_007900          | ECT2                         | -2.93 | -2.42 | epithelial cell transforming sequence 2 oncogene            |
| ENSMUST00000090782 | ENSMUST00000090782           | -1.79 | -1.75 | Unknown                                                     |
| ENSMUST00000091560 | ENSMUST00000091560           | -1.12 | -1.27 | Unknown                                                     |
| ENSMUST00000101051 | ENSMUST00000101051           | -2.17 | -1.91 | Unknown                                                     |
| NM_198605          | SKA3                         | -1.55 | -1.81 | spindle and kinetochore associated complex subunit 3        |
| BC094429           | C6ORF167                     | -1.61 | -1.23 | chromosome 6 open reading frame 167                         |
| NM_016925          | FANCA                        | -1.67 | -1.35 | Fanconi anemia, complementation group A                     |
| NM_011711          | FMNL3                        | -1.46 | -1.38 | formin-like 3                                               |
| NM_133236          | GLCC11                       | -2.35 | -1.99 | glucocorticoid induced transcript 1                         |
| NM_020567          | GMNN                         | -1.89 | -1.11 | geminin, DNA replication inhibitor                          |
| XM_986527          | Gna12                        | -1.17 | -1.12 | Unknown                                                     |
| NM_029522          | GPSM2                        | -1.51 | -1.7  | G-protein signaling modulator 2                             |
| NM_146120          | GSN                          | -1.36 | -1.1  | gelsolin                                                    |
| NM_008197          | H1F0                         | -1.86 | -1.77 | H1 histone family, member 0                                 |
| BC028539           | H2AFV                        | -2.31 | -1.84 | H2A histone family, member V                                |
| NM_010436          | H2AFX                        | -2.55 | -2.39 | H2A histone family, member X                                |
| NM_020034          | HIST1H1B                     | -1.72 | -2.18 | histone cluster 1, H1b                                      |
| NM_015786          | HIST1H1C                     | -1.13 | -1.33 | histone cluster 1, H1c                                      |
| NM_015787          | HIST1H1E                     | -2.08 | -2.16 | histone cluster 1, H1e                                      |
| NM_175660          | HIST1H2AE (includes EG:3012) | -1.63 | -1.91 | histone cluster 1, H2ae                                     |
| NM_175661          | HIST1H2AI                    | -1.66 | -2.12 | histone cluster 1, H2ai                                     |
| NM_178182          | HIST1H2AE (includes EG:3012) | -3.34 | -2.49 | histone cluster 1, H2ae                                     |
| NM_178183          | HIST1H2AD                    | -3.08 | -2.46 | histone cluster 1, H2ad                                     |
| NM_178192          | HIST4H4                      | -1.88 | -1.81 | histone cluster 4, H4                                       |
| NM_175654          | HIST4H4                      | -2    | -2.13 | histone cluster 4, H4                                       |
| NM_175655          | HIST4H4                      | -2.05 | -2.05 | histone cluster 4, H4                                       |
| NM_175662          | HIST2H2AC                    | -1.62 | -1.45 | histone cluster 2, H2ac                                     |
| NM_033596          | HIST4H4                      | -1.93 | -2.08 | histone cluster 4, H4                                       |
| AK015962           | HIST3H2A                     | -2.05 | -2.17 | histone cluster 3, H2a                                      |
| NM_175652          | HIST4H4                      | -1.98 | -1.71 | histone cluster 4, H4                                       |
| NM_010439          | HMGB1L1                      | -1.56 | -1.25 | high-mobility group box 1-like 1                            |
| NM_008253          | HMGB3                        | -1.75 | -1.65 | high-mobility group box 3                                   |
| NM_016957          | LOC729505                    | -2.35 | -2.2  | high-mobility group nucleosomal binding domain 2 pseudogene |
| NM_207676          | CADM1                        | -1.8  | -1.76 | cell adhesion molecule 1                                    |
| NM_016692          | INCENP                       | -1.68 | -1.56 | inner centromere protein antigens 135/155kDa                |
| BC068159           | IQGAP3                       | -1.79 | -2.07 | IQ motif containing GTPase activating protein 3             |

|              |           |       |       |                                                              |
|--------------|-----------|-------|-------|--------------------------------------------------------------|
| BC024571     | ITGA6     | -1.55 | -1.14 | integrin, alpha 6                                            |
| BC080858     | KBTBD11   | -2.43 | -1.49 | kelch repeat and BTB (POZ) domain containing 11              |
| NM_010615    | KIF11     | -2.64 | -5.1  | kinesin family member 11                                     |
| XM_619672    | KIF14     | -2.12 | -1.87 | kinesin family member 14                                     |
| NM_139303    | KIF18A    | -1.37 | -1.68 | kinesin family member 18A                                    |
| NM_145588    | KIF22     | -3.15 | -2.62 | kinesin family member 22                                     |
| NM_024245    | KIF23     | -2.03 | -1.86 | kinesin family member 23                                     |
| NM_008446    | KIF4A     | -2.71 | -2.22 | kinesin family member 4A                                     |
| NM_010722    | LMNB2     | -1.44 | -1.17 | lamin B2                                                     |
| XR_003516    | LOC619863 | -2.88 | -2.28 | Unknown                                                      |
| XM_001004490 | EFR3B     | -1.69 | -1.55 | EFR3 homolog B ( <i>S. cerevisiae</i> )                      |
| NM_019391    | LSP1      | -1.52 | -1.57 | lymphocyte-specific protein 1                                |
| NM_133762    | NCAPG2    | -2.68 | -2.38 | non-SMC condensin II complex, subunit G2                     |
| NM_019499    | MAD2L1    | -1.8  | -1.71 | MAD2 mitotic arrest deficient-like 1 (yeast)                 |
| NM_027290    | MCM10     | -2.42 | -1.51 | minichromosome maintenance complex component 10              |
| BC082308     | MFHAS1    | -1.41 | -1.31 | malignant fibrous histiocytoma amplified sequence 1          |
| BC090402     | MGC73635  | -2.3  | -2.15 | Unknown                                                      |
| NM_010796    | CLEC10A   | -1.36 | -1.23 | C-type lectin domain family 10, member A                     |
| NM_145137    | CLEC10A   | -2.67 | -3.03 | C-type lectin domain family 10, member A                     |
| X82786       | MKI67     | -3.31 | -3.02 | antigen identified by monoclonal antibody Ki-67              |
| NM_026178    | MMD       | -1.88 | -1.85 | monocyte to macrophage differentiation-associated            |
| NM_029797    | MND1      | -1.49 | -1.3  | meiotic nuclear divisions 1 homolog ( <i>S. cerevisiae</i> ) |
| NM_028021    | MYH14     | -1.55 | -1.68 | myosin, heavy chain 14, non-muscle                           |
| NM_016701    | NES       | -1.33 | -1.21 | nestin                                                       |
| NM_134122    | NRM       | -1.8  | -1.39 | nurim (nuclear envelope membrane protein)                    |
| NM_133947    | NUMA1     | -1.47 | -1.24 | nuclear mitotic apparatus protein 1                          |
| NM_133851    | NUSAP1    | -2.91 | -3.16 | nucleolar and spindle associated protein 1                   |
| NM_011045    | PCNA      | -1.1  | -1.11 | proliferating cell nuclear antigen                           |
| NM_008787    | PCNT      | -1.27 | -1.26 | pericentrin                                                  |
| NM_145150    | PRC1      | -3.42 | -3.36 | protein regulator of cytokinesis 1                           |
| NM_139200    | CYTIP     | -2    | -1.98 | cytohesin 1 interacting protein                              |
| NM_019976    | PSRC1     | -1.76 | -2.19 | proline/serine-rich coiled-coil 1                            |
| NM_021424    | PVRL1     | -1.58 | -1.31 | poliovirus receptor-related 1 (herpesvirus entry mediator C) |
| NM_009009    | RAD21     | -1.28 | -1.31 | RAD21 homolog ( <i>S. pombe</i> )                            |
| NM_009013    | RAD51AP1  | -2.18 | -1.67 | RAD51 associated protein 1                                   |
| NM_207246    | RASGRP3   | -3.23 | -2.45 | RAS guanyl releasing protein 3 (calcium and DAG-regulated)   |
| NM_138956    | RASSF3    | -1.34 | -1.28 | Ras association (RalGDS/AF-6) domain family member 3         |
| NM_011249    | RBL1      | -1.75 | -1.44 | retinoblastoma-like 1 (p107)                                 |
| NM_025654    | RDM1      | -2.2  | -1.86 | RAD52 motif 1                                                |
| NM_173402    | RGS12     | -1.62 | -1.53 | regulator of G-protein signaling 12                          |
| NM_022881    | RGS18     | -1.99 | -1.43 | regulator of G-protein signaling 18                          |
| NM_009061    | RGS2      | -3.03 | -2.98 | regulator of G-protein signaling 2, 24kDa                    |
| NM_026653    | RPA1      | -1.5  | -1.27 | replication protein A1, 70kDa                                |
| NM_011284    | RPA2      | -1.3  | -1.11 | replication protein A2, 32kDa                                |

|           |           |       |       |                                                                     |
|-----------|-----------|-------|-------|---------------------------------------------------------------------|
| NM_028232 | SGOL1     | -2.63 | -2.3  | shugoshin-like 1 (S. pombe)                                         |
| NM_199007 | SGOL2     | -2.25 | -2.18 | shugoshin-like 2 (S. pombe)                                         |
| NM_011369 | SHCBP1    | -3.44 | -2.37 | SHC SH2-domain binding protein 1                                    |
| NM_009193 | SLBP      | -1.41 | -1.3  | stem-loop binding protein                                           |
| NM_207213 | SNX25     | -1.81 | -1.18 | sorting nexin 25                                                    |
| NM_026282 | SPC24     | -2.88 | -3.06 | SPC24, NDC80 kinetochore complex component, homolog (S. cerevisiae) |
| NM_025565 | SPC25     | -2.39 | -2.41 | SPC25, NDC80 kinetochore complex component, homolog (S. cerevisiae) |
| NM_153070 | Srgap3    | -1.61 | -1.7  | Unknown                                                             |
| NM_019641 | STMN1     | -2.35 | -2.06 | stathmin 1                                                          |
| NM_011513 | MED22     | -1.41 | -1.52 | mediator complex subunit 22                                         |
| TC1429930 | TC1429930 | -2.17 | -1.53 | Unknown                                                             |
| TC1434027 | TC1434027 | -2.61 | -2.49 | Unknown                                                             |
| TC1502405 | TC1502405 | -1.16 | -1.76 | Unknown                                                             |
| NM_011589 | TIMELESS  | -1.72 | -1.22 | timeless homolog (Drosophila)                                       |
| NM_177260 | TMEM154   | -2.69 | -1.86 | transmembrane protein 154                                           |
| AK009669  | TMEM158   | -2.18 | -2.6  | transmembrane protein 158 (gene/pseudogene)                         |
| U39074    | TMPO      | -1.37 | -1.4  | thymopoietin                                                        |
| NM_028109 | TPX2      | -1.57 | -1.45 | TPX2, microtubule-associated, homolog (Xenopus laevis)              |
| NM_027763 | TREML1    | -1.72 | -1.53 | triggering receptor expressed on myeloid cells-like 1               |
| NM_019634 | TSPAN7    | -1.28 | -1.41 | tetraspanin 7                                                       |
| NM_028639 | TTC7A     | -1.28 | -1.4  | tetratricopeptide repeat domain 7A                                  |
| NM_028006 | TUBE1     | -1.52 | -1.52 | tubulin, epsilon 1                                                  |
| M30774    | Tyms-ps   | -1.4  | -1.47 | Unknown                                                             |
| NM_194342 | SUN2      | -1.17 | -1.57 | Sad1 and UNC84 domain containing 2                                  |
| NM_172598 | WDHD1     | -1.47 | -1.43 | WD repeat and HMG-box DNA binding protein 1                         |
| AK050869  | WHSC1     | -1.65 | -1.68 | Wolf-Hirschhorn syndrome candidate 1                                |
| NM_026507 | ZWILCH    | -1.39 | -1.34 | Zwilch, kinetochore associated, homolog (Drosophila)                |

---

A corrected one-way analysis of variance was used to analyze the microarray data. Genes whose expression levels changed by at least 1.5-fold or more down-regulated genes ( $P < 0.05$ ) as compared to unstimulated cells were considered to be differentially expressed in a statistically significant manner.
